1 Title: Differential migration mechanics and immune responses of  
2 glioblastoma subtypes

3  
4 Authors: Ghaidan A. Shamsan<sup>1</sup>, Chao J. Liu<sup>1,11</sup>, Brooke C. Braman<sup>1</sup>, Susan K. Rathe<sup>2</sup>,  
5 Aaron L. Sarver<sup>2,3</sup>, Nima Ghaderi<sup>4</sup>, Mariah M. McMahon<sup>1</sup>, Rebecca L. Klank<sup>1</sup>, Barbara  
6 R. Tschida<sup>2</sup>, S. Joey McFarren<sup>2</sup>, Pamela C. Rosato<sup>5,12</sup>, David Masopust<sup>5</sup>, Jann N.  
7 Sarkaria<sup>6</sup>, H. Brent Clark<sup>7</sup>, Steven S. Rosenfeld<sup>8+</sup>, David A. Largaespada<sup>2,9+</sup>, David J.  
8 Odde<sup>10+</sup>

9  
10 Affiliations:

11 <sup>1</sup> Department of Biomedical Engineering, University of Minnesota, Minneapolis, MN  
12 55455

13 <sup>2</sup> Masonic Cancer Center, University of Minnesota, Minneapolis, MN 55455

14 <sup>3</sup> Institute for Health Informatics, University of Minnesota, Minneapolis, MN 55455

15 <sup>4</sup> Department of Mechanical Engineering, University of Minnesota, Minneapolis, MN  
16 55455

17 <sup>5</sup> Department of Microbiology and Immunology, Center for Immunology, University of  
18 Minnesota, Minneapolis, MN, 55455

19 <sup>6</sup> Department of Radiation Oncology, Mayo Clinic, Rochester, MN, 55902

20 <sup>7</sup> Laboratory Medicine and Pathology, University of Minnesota, Minneapolis, MN 55455

21 <sup>8</sup> Department of Molecular Pharmacology and Experimental Therapeutics, Mayo Clinic,  
22 Jacksonville, FL 32224

23 <sup>9</sup> Department of Pediatrics, University of Minnesota, Minneapolis, MN 55455

24 <sup>10</sup> Department of Biomedical Engineering, University of Minnesota, Minneapolis, MN  
25 55455, USA. Electronic address: [oddex002@umn.edu](mailto:oddex002@umn.edu).

26 <sup>11</sup> Present address: Athinoula A. Martinos Center for Biomedical Imaging, Department of  
27 Radiology, Massachusetts General Hospital/Harvard Medical School, Charlestown, MA  
28 02129

29 <sup>12</sup> Present address: Department of Microbiology and Immunology, The Geisel School of  
30 Medicine at Dartmouth, Lebanon, NH 03756

31 + co-senior authors

32  
33

## 34 **SUMMARY:**

35           Glioblastoma remains a deadly cancer driven by invasion of tumor cells into the  
36 brain. Transcriptomic analyses have revealed distinct molecular subtypes, but  
37 mechanistic differences that explain clinical differences are not clear. Here, we show  
38 that, as predicted by the motor-clutch model for cell migration, mesenchymal glioma  
39 cells are more spread, generate larger traction forces, and migrate faster in brain tissue  
40 compared to proneural cells. Despite their fast migration and comparable proliferation  
41 rate in vitro, mice with mesenchymal tumors live longer than mice with proneural  
42 tumors, which was correlated with an immune response in the mesenchymal mice that  
43 included T cell-mediated killing of cancer cells, similar to human tumors. Thus,  
44 mesenchymal tumors have aggressive migration, but are relatively immunologically 'hot'  
45 which suppresses net proliferation. These two features counteract each other and may  
46 explain the lack of a strong survival difference between subtypes clinically, while also  
47 opening up new opportunities for subtype-specific therapies.

## 48 INTRODUCTION:

49 Glioblastoma (GBM: WHO grade IV primary brain tumor) progression can be  
50 characterized in terms of tumor growth and spreading, two key parameters which are  
51 influenced by many of the hallmarks of cancer (Hanahan and Weinberg, 2011). In GBM,  
52 tumor spreading is driven by tumor cells' ability to infiltrate healthy brain parenchyma,  
53 which prevents complete surgical resection and results in tumor recurrence (de Gooijer  
54 et al., 2018; Hoelzinger et al., 2007; Lefranc et al., 2005). Molecular and genetic  
55 analyses of human GBM have identified at least three distinct molecular subtypes:  
56 proneural, classical, and mesenchymal (Phillips et al., 2006; Verhaak et al., 2010; Wang  
57 et al., 2017). These subtypes were shown to strongly correlate with specific genetic  
58 alterations (Mesenchymal: *NF1* loss; Classical: *EGFRvIII*; Proneural: *PDGFRA*) and  
59 cellular developmental states (Nefitel et al., 2019; Patel et al., 2014; Verhaak et al.,  
60 2010; Wang et al., 2017). Despite accumulating evidence of distinct transcriptomic and  
61 genetic signatures, the characteristic mechanistic differences between such signatures,  
62 if any, have not been identified. As a result, it remains unclear how knowledge of the  
63 different subtypes should inform clinical decisions.

64 One intriguing correlate of subtype is the level of CD44 expression, a cell surface  
65 protein expressed on tumor and immune cells, which is known to play a role in cancer  
66 progression across a variety of cancers including GBM (Bhat et al., 2013; Klank et al.,  
67 2017; Mao et al., 2013; Mooney et al., 2016; Naor et al., 2002; Nefitel et al., 2019;  
68 Ozawa et al., 2014; Pietras et al., 2014; Toole, 2009; Wang et al., 2017). In GBM, we  
69 previously showed that CD44 expression is a prognostic marker with a biphasic  
70 dependence: better outcomes are observed at both lower and higher levels of CD44

71 while poorer outcomes are observed at intermediate levels, an example of optimality  
72 and the ‘goldilocks’ phenomenon (Klank et al., 2017). In animal models, CD44  
73 expression has further been shown to correlate with glioma cell migration in a biphasic  
74 relationship with a peak migration rate at intermediate expression level, which also  
75 correlated with the minimum in survival in both the animal model and human GBM  
76 (Klank et al., 2017). In addition, *CD44* transcript levels are shown to vary across GBM  
77 molecular subtypes with elevated expression in mesenchymal tumors (Phillips et al.,  
78 2006; Pietras et al., 2014; Verhaak et al., 2010). *CD44* expression in the mesenchymal  
79 tumors is, on average, closer to the *CD44* level that corresponds to the minimum in  
80 patient survival than the proneural subtype (Klank et al., 2017). As an adhesion  
81 molecule, CD44 engages the extracellular matrix with the actin cytoskeleton through  
82 adapter proteins to mediate cell migration (Toole, 2009). This suggests that  
83 mesenchymal cells have a near-optimal level of CD44 adhesion molecules to serve as  
84 molecular “clutches” that resist myosin II motor forces, allowing them to migrate faster  
85 than proneural cells which on average have a lower, suboptimal level of CD44 clutches  
86 (see Figure 2B and 4E in Klank *et al.*, 2017). This could then explain the slightly worse  
87 outcomes for mesenchymal patients and higher cell migration and invasion (Wang et  
88 al., 2017; Yoshida et al., 2012). In addition, it would predict that mesenchymal cells  
89 would have larger cellular spread area, be more polarized, and generate more traction  
90 force as they migrate. More generally, lower CD44 is indicative of an epithelial state and  
91 higher CD44 indicative of a mesenchymal state (Bloushtain-Qimron et al., 2008; Polyak  
92 and Weinberg, 2009), and so an increase in myosin motors and adhesions, either

93 integrin- or CD44-mediated, may be driving the epithelial-to-mesenchymal transition  
94 (EMT) in a variety of cancers such as breast cancer (Mekhdjian et al., 2017).

95       Based on these previous results, we tested the hypothesis that a key mechanistic  
96 difference between GBM molecular subtypes is that proneural cells are slow migrating  
97 and mesenchymal cells are fast migrating. To address this question, we generated  
98 animal models recapitulating the transcriptomic signatures of human mesenchymal and  
99 proneural GBM in an immune competent background using perturbations of known  
100 GBM oncogenic pathways. Specifically, mesenchymal and proneural-like tumors were  
101 driven by SV40-large T (LgT) antigen, to mimic common inhibition of p53 and Rb  
102 signaling found in GBM (Ahuja et al., 2005; McLendon et al., 2008), in combination with  
103 either NRAS<sup>G12V</sup> (NRAS) or PDGFB (PDGF), respectively, which resulted in  
104 mesenchymal or proneural transcriptomic features with only a single genetic change  
105 required to switch subtypes in a wild type mouse background. As predicted, *CD44*  
106 expression was higher in NRAS-driven tumors and, consistent with our simulation  
107 predictions, *ex vivo* brain slice live imaging showed NRAS tumor cells migrate faster  
108 than PDGF tumor cells, and exhibit greater spreading, polarization, and force  
109 generation as well. Despite increased migration, the NRAS cohort had better survival  
110 than PDGF which was attributed to enhanced antitumoral immune response in NRAS  
111 tumors, consistent with increased immune cell infiltration in human mesenchymal GBM  
112 (Doucette et al., 2013; Hara et al., 2021; Wang et al., 2021, 2017). Overall our work  
113 identified a clinically actionable difference in migration mechanics between GBM  
114 subtypes and establishes an integrated biophysical modeling and experimental

- 115 approach to mechanically parameterize and simulate distinct molecular subtypes in  
116 preclinical models of cancer.

## 117 **RESULTS:**

### 118 **Genetically induced high-grade glioma mouse models recapitulate the** 119 **transcriptomic signatures of mesenchymal and proneural GBM**

120 To characterize the mechanics of GBM subtypes, we utilized the *Sleeping*  
121 *Beauty* (SB) transposon-based gene transfer system to induce high grade gliomas in  
122 immunocompetent FVB/NJ-strain mice (Calinescu et al., 2015; Klank et al., 2017;  
123 Koschmann et al., 2016; Núñez et al., 2019; Wiesner et al., 2009). Constructs of  
124 plasmids carrying SB transposons with oncogenic driver transgenes (SV40-  
125 LgTA+NRAS<sup>G12V</sup> or SV40-LgTA+PDGFB; here termed NRAS and PDGF, respectively)  
126 were used to model mesenchymal and proneural GBM tumors, respectively (Figure 1A).  
127 DNA plasmids carrying an SB transposon with encoded firefly luciferase and green  
128 fluorescent protein (GFP) transgenes, and expressing SB transposase were co-injected  
129 to allow for confirmation of successful gene transfer, detecting tumor development and  
130 monitoring tumor growth using bioluminescence imaging (BLI) and single cell tracking  
131 using fluorescence microscopy. Similar to human GBM, histological sections from these  
132 tumors exhibited highly mitotic tumor cells, necrosis, anaplasia, and perivascular  
133 infiltration and proliferation, (Figure 1B).

134 To assess whether the NRAS and PDGF tumors recapitulated the mesenchymal  
135 and proneural subtypes, respectively, we performed cross-species transcriptomic  
136 analysis using bulk RNA sequencing data from mouse and human tumors. Bulk RNA  
137 sequencing was performed on tumor tissues from both cohorts and on normal brain  
138 tissues (NBT) (NRAS N=4, PDGF N=4, and NBT N=3). IDH-WT human GBM  
139 transcriptomic profiles were retrieved from Broad GDAC Firebrowse (Brennan et al.,

140 2013). Unsupervised hierarchical clustering of the mouse dataset (Table S1) revealed  
141 clear differences between normal tissue and tumor tissue and between NRAS and  
142 PDGF tumors (Figure S1A). Not surprisingly, gene ontology enrichment analysis, using  
143 *EnrichR* (Kuleshov et al., 2016), showed an enrichment of cell cycle related processes  
144 in tumor tissue specific gene cluster (817 genes) (Figure S1B) and neuronal processes  
145 in normal tissue cluster (1722 genes) (Figure S1D). Interestingly, the NRAS-specific  
146 cluster (1327 genes) was enriched with cytokine-mediated signaling and inflammatory  
147 response processes (Figure S1C).

148 To determine whether any variations observed between the two mouse cohorts  
149 were also present in human tumors, unsupervised hierarchical clustering was performed  
150 on both mouse and human tumor datasets and clusters were independently identified in  
151 both datasets (Table S2). Three and 10 gene clusters were identified in both mouse and  
152 human datasets, respectively, as shown in Figure 1C. We identified mouse cluster MC1  
153 (n=1534 genes) as being significantly enriched in genes found in human cluster HC1  
154 (n=1186 genes,  $p < 1 \times 10^{-15}$ ), MC2 (n=414 genes) is significantly enriched in genes  
155 found in HC2 (n=1098 genes,  $p < 1 \times 10^{-15}$ ), and MC3 (n=232 genes) is significantly  
156 enriched in genes enriched in HC4 (n=432,  $p < 1 \times 10^{-15}$ ). These results show that  
157 conserved transcriptomic patterns distinguish subtypes of both mouse and human  
158 tumors.

159 To assess whether the transcriptional patterns present in the mouse tumor  
160 models represent previously described GBM subtypes, we compared the expression of  
161 identified mouse gene clusters within human GBM subtypes. We found that MC1, which  
162 is enriched in NRAS tumors, is significantly enriched in human mesenchymal GBM



163 relative to proneural and classical GBMs (Figure 1D). In contrast, MC3, which is  
164 enriched in PDGF tumors, is significantly enriched in proneural GBM relative to  
165 mesenchymal and classical GBMs (Figure 1D). Furthermore, we found the expression  
166 of known mesenchymal and proneural genes and gene signatures are relatively  
167 elevated in NRAS and PDGF tumors, respectively (Figure 1E, 1F and S2). These  
168 results demonstrate that NRAS and PDGF tumors transcriptionally resemble  
169 mesenchymal and proneural GBMs, respectively.

170

171 **Motor-clutch modeling of cell migration predicts NRAS/Mesenchymal tumor cells**  
172 **will migrate faster, have larger cell spread area, and generate more force than**  
173 **PDGF/Proneural tumor cells**

174

175 To examine tumor cell migration, we used our cell migration simulator  
176 (Bangasser et al., 2017; Klank et al., 2017) to predict migration phenotypes in response  
177 to gene expression changes. The cell migration simulator is based on the motor-clutch  
178 model which incorporates actin-based protrusion dynamics, mass conservation, and  
179 force balances to reproduce cell polarization and random motility in 1D and 2D  
180 compliant microenvironments (Bangasser et al., 2013, 2017; Chan and Odde, 2008;  
181 Estabridis et al., 2018; Hou et al., 2019; Klank et al., 2017; Liu et al., 2019; Prah et al.,  
182 2018, 2020). The number of adhesion/clutches and motors are key determinants of cell  
183 migration, with a relative balance being essential for efficient migration (Bangasser et  
184 al., 2013, 2017; DiMilla et al., 1991). Using a set of 54 cell migration genes expressed in  
185 the human U251 GBM cell line (Bangasser et al., 2017), NRAS tumors significantly  
186 upregulate transcription of adhesion and adapter genes (Figure S3A). A similar set of  
187 genes was also significantly upregulated in MES relative to PN GBM (Figure S3B). Both

188 NRAS and MES tumors upregulated *CD44* and its cognate adhesion adapter gene  
189 moesin (*MSM*), which mechanically links the CD44 cytoplasmic tail to F-actin (Fehon et  
190 al., 2010; Freeman et al., 2018; Legg and Isacke, 1998; Ponta et al., 2003; Toole, 2009;  
191 Tsukita et al., 1994; Yonemura, 1998). Notably, the levels of myosin motor genes were  
192 not differentially expressed in the mouse dataset, while, in the human dataset, *MYH9*  
193 and *MYO1C* were modestly upregulated in MES tumors but to a lesser degree than  
194 adhesion molecules (Figure S3B). These results suggest NRAS/Mesenchymal tumor  
195 cells have a higher number of adhesion/clutches than PDGF/Proneural tumor cells and  
196 little to no change in the number of motors.

197         Based on these results, we simulated the effect of *CD44* expression level on cell  
198 migration by simply adjusting the number of adhesion bonds (number of clutches,  $N_c$ ) in  
199 the model (Bangasser et al., 2017; Klank et al., 2017). We used low clutches relative to  
200 motors (low adhesion) to simulate PDGF/Proneural cells and a medium level of clutches  
201 that balanced the number of motors (optimal adhesion) to simulate NRAS/Mesenchymal  
202 cells (Figure 2A). Our simulations show that lowering the number of adhesions,  
203 representing the PDGF/Proneural case, results in reduced cell migration, force  
204 transmission, cell spread area, and cell polarization due to an insufficient number of  
205 clutches relative to the number of motors, as shown in Figure 2. In the case where the  
206 number of clutches and motors are balanced, representing the NRAS/Mesenchymal  
207 case, where the number of adhesions is increased while holding the number of motors  
208 constant, simulated cells recover their ability to migrate, transmit forces, spread, and  
209 polarize across a range of substrate stiffnesses. Consequently, simulation results  
210 predict that NRAS/Mesenchymal tumor cells will migrate faster than PDGF/Proneural

211 tumor cells due to increase of adhesion (i.e. CD44) expression in NRAS/Mesenchymal  
212 tumors and not due to small difference in molecular motor expression (Figure S3A and  
213 S3B). In addition, due to their higher number of clutches and balanced motor-clutch  
214 ratio, NRAS/Mesenchymal tumor cells are predicted to generate higher force, have  
215 larger spread area, and be more polarized.

216

### 217 **NRAS/Mesenchymal tumor cells migrate faster than PDGF/Proneural tumor cells** 218 **in brain tissue**

219 To test our model prediction that NRAS/Mesenchymal cells migrate faster than  
220 PDGF/Proneural cells, we performed live cell imaging on tumor bearing mouse brain  
221 slices using confocal microscopy. Time-lapse images of GFP-positive tumor cells were  
222 used to track single cell migration and generate single cell trajectories. As shown in  
223 Figure 3A, 3B and Video S1, NRAS/Mesenchymal tumor cells appeared qualitatively to  
224 move farther, have larger spread area, and polarize to a greater extent than  
225 PDGF/Proneural tumor cells. Quantitative analysis of single cell trajectories confirmed  
226 that NRAS/Mesenchymal tumor cells have a higher random motility coefficient than  
227 PDGF/Proneural tumor cells ( $30.1 \mu\text{m}^2 \text{hr}^{-1}$  vs  $2.5 \mu\text{m}^2 \text{hr}^{-1}$ ,  $p < 0.001$ ; see Figure 3C and  
228 S4A). In addition, morphological analysis of tumor cells revealed cell spread area and  
229 cell aspect ratio (i.e. polarization) are also higher in NRAS/Mesenchymal tumor cells  
230 than PDGF/Proneural tumor cells ( $406.6 \mu\text{m}^2$  vs  $235.8 \mu\text{m}^2$ ,  $p < 0.00001$  and  $2.1$  vs  $1.7$ ,  
231  $p < 0.001$ , respectively, see Figure 3D, 3E, S4B and S4C). As predicted by our modeling,  
232 and the hypothesis that NRAS/Mesenchymal has balanced motors and clutches while  
233 PDGF/Proneural lacks sufficient clutches, we find NRAS/Mesenchymal cells migrate  
234 faster, are more spread, and are more polarized than PDGF/Proneural cells.

235

## 236 **Migration phenotype is species and tumor microenvironment independent**

237 To determine whether migration phenotype is cancer cell intrinsic as predicted by  
238 our modeling and not due to microenvironment differences, we generated three primary  
239 mouse lines grown as neurospheres from each cohort to investigate their migration  
240 phenotype outside their tumor microenvironment. Organotypic mouse brain slice culture  
241 was used to image tumor cell migration in healthy mouse brain slices (Liu et al., 2019).  
242 Dissociated mouse tumor cells were plated and allowed to invade and migrate in  
243 healthy mouse brain slices. Figure 4A shows representative fluorescence images of  
244 primary isolated cells in organotypic slice culture. Time-lapse imaging was used to track  
245 single cells and quantify their migration rates. Consistent with the *ex vivo* migration in  
246 intact tumor-bearing brain slices, random motility coefficient in normal mouse brain  
247 tissue is higher for primary NRAS/Mesenchymal tumor cells than primary  
248 PDGF/Proneural tumor cells ( $131.4 \mu\text{m}^2 \text{hr}^{-1}$  vs  $31.3 \mu\text{m}^2 \text{hr}^{-1}$ ,  $p < 0.00001$ ; Figure 4B,  
249 S4D and Video S2). The area of cell spreading is also higher in primary  
250 NRAS/Mesenchymal tumor cells than PDGF/Proneural ( $1075.1 \mu\text{m}^2$  vs  $838.8 \mu\text{m}^2$ ,  
251  $p < 0.001$ ; Figure 4C and S4E). Furthermore, cell aspect ratio, the ratio of major and  
252 minor axis of a fitted ellipse, was trending higher in NRAS/Mesenchymal tumor cells  
253 than PDGF/Proneural but did not reach statistical significance (Figure 4D and S4F).

254 To assess the relevance of these results to human GBM, we tested the migration  
255 phenotype of six patient-derived xenograft (PDX) lines (three mesenchymal and three  
256 proneural) using the organotypic mouse brain slice culture. Figure 4E shows  
257 representative fluorescence images of PDX cells in organotypic slice culture. We found

258 mesenchymal PDX cells migrate faster than proneural PDX cells ( $43. \mu\text{m}^2 \text{hr}^{-1}$  vs  $8.8$   
259  $\mu\text{m}^2 \text{hr}^{-1}$ ,  $p < 0.00001$ ; Figure 4F, S4G and Video S3). In addition, similar to our mouse  
260 models, mesenchymal PDX cells have larger area of cellular spreading and aspect ratio  
261 relative to proneural PDX cells ( $701.7 \mu\text{m}^2$  vs  $564.6 \mu\text{m}^2$ ,  $p < 0.00001$  and  $2.3$  vs  $2.0$ ,  
262  $p < 0.001$ , respectively, see Figure 4G, S4H, 4H and S4I).

263

264 **Traction strain energy is larger for NRAS/Mesenchymal cells than for**  
265 **PDGF/Proneural cells, consistent with model predictions**

266 In addition, cell migration simulations predict NRAS/Mesenchymal tumor cells  
267 would have increased force generation as a result of higher number of clutches  
268 resulting in balanced myosin motors and clutches, relative to PDGF/Proneural tumor  
269 cells which would have insufficient clutches relative to motors (Figure 2D). Using the  
270 primary isolated mouse lines, traction force microscopy was used to measured traction  
271 strain energy generated by tumor cells on polyacrylamide hydrogels (Bangasser et al.,  
272 2017; Butler et al., 2002). Because transcriptomic analysis showed an overall higher  
273 level of adhesion molecules in NRAS/Mesenchymal tumor tissues, including CD44 and  
274 integrins, Type-I Collagen was used to coat polyacrylamide hydrogels (Figure S3A).  
275 Because of the overall higher level of adhesion Consistent with model predictions,  
276 NRAS/Mesenchymal tumor cells generate higher traction strain energy than  
277 PDGF/Proneural tumor cells across different substrate Young's moduli (Figure 5A and  
278 5B). Cell spread area is also higher in NRAS/Mesenchymal than PDGF/Proneural on  
279 polyacrylamide hydrogels (Figure 5C). In addition, NRAS/Mesenchymal cells exhibit  
280 stiffness sensitive cell spreading; cells on stiff substrate ( $4.6$  and  $9.3$  kPa) were more

281 spread than on soft substrate (0.7kPa,  $p < 0.00001$ ; see Figure 5C). Furthermore, we  
282 also examined force generation of mesenchymal and proneural PDX cells in mouse  
283 brain slices. Qualitative analysis of vasculature deformation is consistent with the model  
284 prediction that mesenchymal PDX cells generate larger deformations relative to  
285 proneural PDX cells, as shown in Figure 5D, 5E and Video S3.

286

### 287 **NRAS/Mesenchymal mice have better survival and slower tumor growth rate**

288 Since NRAS/Mesenchymal cells have nearly optimal *CD44* expression, and  
289 therefore higher motility compared to PDGF/Proneural cells which have a suboptimal  
290 low level of *CD44* expression (Klank et al., 2017), we asked whether the differences in  
291 migration rate, morphology and force generation correlate with disease progression and  
292 survival. Specifically, based on the faster migration in the NRAS/Mesenchymal cohort,  
293 we expected that these mice would progress faster and die sooner than  
294 PDGF/Proneural mice. To test this hypothesis, we measured survival times of tumor  
295 bearing mice and found that, opposite to our expectation, the NRAS/Mesenchymal  
296 cohort had better median survival than PDGF/Proneural cohort (NRAS N=21, PDGF  
297 N=24, 65 days vs. 35 days, log-rank test,  $p < 0.0001$ ; Figure 6A). To explain the  
298 difference in survival, we quantified *in vivo* tumor growth using bioluminescence imaging  
299 (BLI) of tumor-bearing mice. Consistent with their shorter survival, we found PDGF  
300 tumors grew twice as fast as NRAS tumors (Slopes:  $0.127 \pm 0.01191$  vs.  $0.0716 \pm 0.00343$   
301  $p < 0.001$ , Figure 6B and 6C). Using mouse tumor neurospheres, we quantified mouse  
302 primary tumor cell line proliferation rates *in vitro* and found no significant difference  
303 between NRAS/Mesenchymal and PDGF/Proneural cells (Figure 6D). These results

304 imply that an additional factor, besides proliferation or migration, enables the  
305 NRAS/Mesenchymal mice to live longer and their tumors to grow slower *in vivo* than  
306 PDGF/Proneural mice.

307

308 **NRAS/Mesenchymal mice have increased immune response relative to**  
309 **PDGF/Proneural mice**

310 Because mesenchymal GBMs are known to be relatively immunologically “hot” –  
311 which presumably confers a survival benefit due to an antitumoral immune response-  
312 relative to immunologically “cold” proneural GBMs (Doucette et al., 2013; Neftel et al.,  
313 2019; Wang et al., 2017), we assessed the extent to which mouse NRAS/Mesenchymal  
314 tumors induce an immunological response relative to PDGF/Proneural tumors and  
315 normal brain tissues. Using our mouse transcriptomic dataset and previously published  
316 GBM immune gene sets (Doucette et al., 2013), NRAS/Mesenchymal tumors were  
317 found to have increased expression of both immune activators and suppressors gene  
318 signatures similar to human mesenchymal GBM (Doucette et al., 2013), as shown in  
319 Figure 7A and 7B. Specifically, expression of immune cell marker genes such as *Aif1*,  
320 *Itgam* (microglia/macrophages) and *Cd3* (T cells) are elevated in NRAS/Mesenchymal  
321 tumors relative to PDGF/Proneural tumors (Figure 7C upper panel) and in  
322 mesenchymal GBMs relative to proneural and classical GBMs (Figure 7C lower panel).  
323 Elevated expression of immune cell markers is indicative of increased immune cell  
324 infiltration in mesenchymal tumors. Consistent with the transcriptomic findings, IHC  
325 staining of NRAS/Mesenchymal and PDGF/Proneural tumor sections revealed  
326 significant levels of immune cell infiltration, including both microglia/macrophages and

327 T-lymphocytes, in NRAS/Mesenchymal but much less so in PDGF/proneural tumors  
328 (Figure 7D). Furthermore, increased immune infiltration and activity in  
329 NRAS/Mesenchymal tumors was accompanied by increased cell killing as measured by  
330 granzyme B and cleaved caspase-3 staining (Figure 7D). Image clustering analysis was  
331 used to quantify CD3, IBA1, granzyme B, and cleaved caspase-3 staining, and  
332 statistically significant differences were observed between NRAS/Mesenchymal and  
333 PDGF/Proneural cohorts (Figure 7E-H). This anti-tumor response was also evident in  
334 the three instances where NRAS mice developed tumors and tumor regression was  
335 observed (Figure S5). Despite the anti-tumor immune response observed in  
336 NRAS/Mesenchymal tumors, transcriptomic analysis also revealed elevated relative  
337 expression of immune checkpoint genes including PDL1, CTLA4, and CD200R1 (Figure  
338 S6). Thus, the NRAS/mesenchymal tumors, like human mesenchymal GBMs, are  
339 relatively immunologically “hot” with evidence of both immune activation and immune  
340 suppression, as well as evidence of cell killing. Altogether, the enhanced immune cell-  
341 associated tumor cell killing provides a mechanism by which survival is extended in  
342 NRAS/Mesenchymal tumors despite their enhanced migration speeds relative to  
343 PDGF/Proneural tumors.

344

### 345 **Brownian dynamics simulations explain NRAS/Mesenchymal and**

### 346 **PDGF/Proneural tumor progression**

347 To quantitatively describe the interplay between tumor cell migration and  
348 proliferation and anti-tumoral immune response in tumor growth, we developed a three-  
349 dimensional (3D) Brownian dynamics tumor simulator (BDTS) based on our original 1D



350 Brownian dynamics simulator (Klank et al., 2018; Ray et al., 2018). The simulator takes  
351 into account anti-tumoral immune cells that infiltrate tissue, migrate, proliferate,  
352 encounter cancer cells, deliver cytotoxic agents, dissociate from cancer cells, undergo  
353 exhaustion, and, eventually, undergo apoptosis (or egress to lymphatics) as shown in  
354 Figure 8A. At the same time, cancer cells migrate, proliferate and undergo CTL-  
355 mediated death in the presence of anti-tumoral immune cells in the case  
356 NRAS/Mesenchymal tumors. In the case of PDGF/Proneural tumors, no anti-tumoral  
357 immune cells were simulated. Figure 8B shows simulation output at day 0 and day 16,  
358 which showed the observed behavior of overall faster growth of PDGF/Proneural  
359 tumors. In the NRAS/Mesenchymal tumor simulations, cancer cells appear more  
360 dispersed, whereas, in PDGF/Proneural simulations, cancer cells are less dispersed.  
361 Simulated tumor growths were plotted in Figure 8C and shown in Video S4. Using the  
362 parameters in Table S5, including the experimentally observed single cell migration  
363 speeds and neurosphere proliferation rates, simulated tumors qualitatively recapitulate  
364 the *in vivo* growth profile of NRAS/Mesenchymal and PDGF/Proneural tumors without  
365 parameter adjustment (Figure 8C).

## 366 **DISCUSSION:**

367           Understanding glioma progression and the mechanism driving glioma cell  
368 migration is critical for the design of effective therapies. Here we developed high-grade  
369 glioma mouse models which capture the transcriptomic and the immune  
370 microenvironment changes associated with human proneural and mesenchymal GBMs.  
371 Using the mouse models and PDX lines, we defined a mechanistic difference in glioma  
372 cell migration which highlights a functional characteristic of GBM molecular subtypes.  
373 The migration difference was consistent with changes in cellular adhesion, notably by  
374 *CD44*, but not molecular motors such as myosin II motors. This finding points toward an  
375 anti-migratory therapy approach targeted against cellular adhesion as opposed to  
376 myosin motors. With the negative Phase III clinical trial of the integrin-inhibitor,  
377 Cilengitide for GBM (Stupp et al., 2014), it is possible that integrins may not be the  
378 major adhesion molecules utilized by glioma cells to migrate but instead they could  
379 utilize CD44. While anti-CD44 therapies have not been tried in GBM, an anti-CD44  
380 monoclonal antibody therapy (RO5429083, Roche, Basel, Switzerland) has been  
381 investigated in Phase I trials in patients with solid tumors and with AML (Menke-van der  
382 Houven van Oordt et al., 2016; Vey et al., 2016). Therefore, an anti-CD44 therapy could  
383 provide clinical benefits by slowing glioma migration.

384

385           Furthermore, the upregulation of CD44 in mesenchymal tumors is supportive of  
386 the existing literature which defines CD44 as a marker of cancer stem cell and EMT  
387 (Bloushtain-Qimron et al., 2008; Polyak and Weinberg, 2009; Ponta et al., 2003). During  
388 EMT, cancer cells take a more mesenchymal migratory phenotype to allow them to

389 migrate through dense ECM and metastasize (Chaffer and Weinberg, 2011). Our  
390 results associate enhanced migration in mesenchymal glioma cells with increased  
391 traction forces due to increased adhesion molecules expression ‘clutches’ such as  
392 CD44. Similarly, in breast cancer cells, TGF- $\beta$ -induced EMT is associated with  
393 increased traction forces and clutch number (Mekhdjian et al., 2017). Interestingly,  
394 downregulation of NF1, a negative regulator of Ras, in epithelial breast cancer cells and  
395 Schwann cells also induces expression of transcription factors related to EMT (Arima et  
396 al., 2010). Moreover, in our study, NRAS<sup>G12V</sup> expression was used to mimic NF1  
397 downregulation and inactivation in mesenchymal GBM (Krusche et al., 2016; Verhaak et  
398 al., 2010). Ras hyperactivation of MAPK pathway is required for EMT but not PI3K  
399 activation by Ras (Janda et al., 2002). Altogether, our results implicate EMT in  
400 enhanced glioma cell migration and force transmission associated with increased  
401 molecular clutches through, and suggest upregulation of clutches, either integrins or  
402 CD44, as a conserved feature of EMT across a range of cancers.

403         Despite the faster migration of the NRAS/Mesenchymal cells, the anti-tumoral  
404 immune response within the NRAS/Mesenchymal mouse model is able to slow disease  
405 progression and improve survival despite enhanced migration relative to the  
406 PDGF/Proneural mouse model. Such an anti-tumor response could potentially be used  
407 to slow disease progression and improve clinical outcome for GBM patients. In both  
408 mouse and human GBM, mesenchymal tumors are immunologically ‘hot’ relative to the  
409 immunologically ‘cold’ proneural tumors (Doucette et al., 2013; Wang et al., 2017).  
410 Despite the presence of immune cells within mesenchymal tumors, immune  
411 suppression leads to tumors ultimately prevailing against the anti-tumoral immune

412 response. Based on these findings, we propose an immune checkpoint inhibition  
413 strategy, in combination with an anti-migratory therapy, targeting mesenchymal GBM  
414 but not proneural GBM.

415 Our study utilizes an integrated, state of the art experimental approach to study  
416 GBM progression and model GBM molecular subtypes by switching a single oncogenic  
417 driver (NRAS<sup>G12V</sup> ↔ PDGFB), in an immunocompetent background without the need for  
418 genetically engineered mouse strains or further breeding. Using live cell and brain slice  
419 imaging, we identify key mechanical differences between mesenchymal and proneural  
420 tumor cells, with mesenchymal cells have larger cellular spread area, generate larger  
421 forces, and migrate faster. The functional differences were all predicted by a motor-  
422 clutch model for cell adhesion and migration where mesenchymal cells have an optimal  
423 level of CD44-mediated adhesion (clutches) relative to myosin motors, while proneural  
424 cells lack sufficient CD44 to match the myosin motor activity. Despite the faster  
425 migration, NRAS/Mesenchymal mice live longer, consistent with the presence of an  
426 anti-tumoral immune response that is lacking in PDGF/Proneural mice (Fig. 8D),  
427 dynamics that are readily captured computationally with little parameter adjustment  
428 using a 3-D Brownian dynamics tumor simulator (BDTS). Overall, this work establishes  
429 an integrated *in vivo* genetic and biophysical modeling framework to connect animal  
430 model and human transcriptionally-defined subtypes to fundamental mechanistic  
431 understanding, which has the potential to enable a new modeling-centric approach to  
432 clinical translation with application in a wide range of cancers (Brubaker and  
433 Lauffenburger, 2020).

434

## 435 **MATERIALS AND METHODS:**

### 436 **Generation of mouse tumor models**

437 All animal studies were conducted according to guidelines approved by the  
438 Institutional Animal Care and Use Committee at the University of Minnesota. All animals  
439 were housed in a daily monitored animal facility. FVB/NJ strain of mice were used in this  
440 study. Malignant gliomas were induced in neonatal mice by DNA plasmid injection into  
441 the right lateral ventricle as described previously (Calinescu et al., 2015; Wiesner et al.,  
442 2009). Briefly, neonatal mice were injected with 1 µg of plasmid DNA mixed with  
443 polyethyleneimine (jetPEI, Polyplus, Berkeley, CA), and 5% dextrose in a total volume  
444 of 2 µL at a rate of 0.7 µL/min. The following four plasmids were used (1:1:1:1) ratio:  
445 empty vector, pT2/C-Luc/PGK-SB100, pT/CMV-LgTA<sub>g</sub>-IRES-GFP, pT2/Cag-NrasV12  
446 or pT2/Cag-mPDGF. Animals were monitored daily for morbidity by bioluminescent  
447 imaging.

448

### 449 **Immunohistochemistry of mouse tumor sections**

450 Formalin fixed and paraffin embedded (FFPE) mouse brain tissues were used to  
451 prepare 4 µm thick slides. FFPE tissue slides were stained with hematoxylin and eosin  
452 (H&E) or IHC using standard methods. Table S6 contains a list of antibodies and  
453 reagents used for antigen retrieval, blocking and detection.

454

### 455 **Quantification of IHC staining of mouse tumor sections**

456 Immunohistochemistry data was quantified by counting the number of pixels in  
457 an image that were positively DAB stained. To avoid user bias and subjective counting,  
458 k-means clustering was used to identify pixels representing areas of positive DAB,  
459 hematoxylin staining, and background. In this implementation, every pixel in an  
460 analyzed image is assigned to one of four clusters, each cluster representing a different  
461 component in the image: positive DAB-stained areas (brown), positive hematoxylin  
462 counter-stained areas (blue), unstained tissue (light blue), and background glass slide  
463 (beige). Digital images of equal sizes (2000x2000 pixels) of DAB stained and  
464 hematoxylin counterstained tumor samples were converted from RGB to the HSV color  
465 model.

466 Using a custom written MATLAB algorithm, user input is used to define areas  
467 representing the four components (positive DAB stain, hematoxylin counterstain,  
468 unstained tissue, and background glass slide). These points are used as the initial  
469 estimates for the centroid locations of each of the four clusters. The squared Euclidean  
470 distance between each pixel's HSV coordinates and the HSV coordinates of each  
471 cluster's centroid is computed. Each pixel is then assigned to the cluster with the  
472 minimum squared Euclidean distance to the cluster centroid. Cluster centroids are  
473 recalculated as the mean of the HSV coordinated of all current members. This process  
474 is iterated until the centroid of each cluster is stable. The number of pixels in the positive  
475 DAB-stained cluster is used to quantify percent positive pixels in Figure 7E-H.

476

477 **Transcriptional profiling of mouse tumors**

478 Mice were euthanized in a CO<sub>2</sub> chamber and perfused transcardially with isotonic  
479 saline. Mouse brains were extracted and GFP goggle (#FHS/EF-2G2; BLS-ltd,  
480 Budapest, Hungary) was used to dissect GFP-positive tumor tissues from NRAS and  
481 PDGF mouse brains. Two matched normal brain tissues were collected from brain  
482 regions away from the tumor and an additional normal brain tissue sample was  
483 collected from a health FVB adult mouse. All samples were immediately placed in  
484 *RNALater* solution (Sigma, St. Louis, MO) for 24 hours then flash frozen in liquid  
485 nitrogen and stored in -80 °C for downstream processing. RNA extraction and  
486 sequencing were performed at the University of Minnesota Genomics Center (UMGC,  
487 Minneapolis, MN). RNA was extracted using *RNAeasy* Plus Universal Mini kit (Qiagen,  
488 Venlo, Netherlands) and libraries were prepared using *TruSeq* stranded mRNA  
489 (Illumina, San Diego, CA).

490 Next-generation sequencing was performed on the prepared RNA libraries using  
491 an Illumina HiSeq 2500 device in high output mode and generated 51 bp reads with an  
492 approximate depth of 20 million paired reads per sample. Mapping and expression  
493 calculations were generated using the rnaseq-pipeline of Gopher-pipelines  
494 (<https://bitbucket.org/jgarbe/gopher-pipelines>), which executed TopHat2 (Kim et al.,  
495 2013) and Cuffnorm (Trapnell et al., 2010) using the UCSC mm10 version of the mouse  
496 reference genome. Fastq files and the Cuffnorm output were deposited at Gene  
497 Expression Omnibus (GSE161154).

498

499 **Human GBM transcriptomic data**

500 UNC RNASeqV2 level 3 expression (normalized RSEM) profiles of 171 samples  
501 (TCGA-GBM) were retrieved from Broad GDAC Firebrowse (Brennan et al., 2013). IDH  
502 status and subtype information were added to each sample based on the *Wang et al.*  
503 classification (Wang et al., 2017). For downstream analysis, 147 IDH-WT samples were  
504 used (57 Classical; 52 Mesenchymal; 38 Proneural).

505

### 506 **Clustering analysis of mouse and human expression profiles**

507 To analyze the transcriptional profiles of mouse and human datasets, a value of  
508 0.1 was added to all FPKM and RSEM values to minimize the impact of inaccurate low  
509 values (Scott et al., 2018). The expression data was log transformed and mean  
510 centered and transcripts with Standard Deviation > 1 were clustered using average  
511 linkage hierarchical clustering in MATLAB. Pearson correlation was used as the  
512 similarity metric. A custom written MATLAB script was used to systematically identify  
513 transcriptional clusters within each dataset. In mouse dataset, a correlation greater than  
514 0.5 and > 100 transcripts were used to identify gene clusters. Whereas, in human  
515 dataset, a correlation greater than 0.2 and >100 transcripts were used. Fisher's exact  
516 test was used to compare cluster memberships in Figure 1C. All genes identified within  
517 each cluster are listed in Table S2.

518 To quantify the relative expression of gene clusters in Figure 1D and subtype  
519 gene signature set in Figure S2C and S2D, the average relative expression of each  
520 gene set was computed for all samples. The average relative expression from each  
521 sample was plotted and used to calculate mean relative expression within each mouse  
522 cohort and within human GBM molecular subtype.



523

## 524 **Generation of mouse primary tumor lines**

525           For each line, a tumor bearing mouse was euthanized and transcardially  
526 perfused with isotonic saline. Tumor tissue was collected and minced with a scalpel.  
527 Minced tumor fragments were incubated with PBS for 15 min at 37 °C. Tumor fragments  
528 were further dissociated by mixing them up and down using a 1000 µl micropipette.  
529 Finally, tumor suspension was passed through a 40 µm sterile cell strainer (Thermo  
530 Fischer Scientific, Waltham, MA) and filtrate was spun down and plated on a Matrigel  
531 (354230; Corning, Corning, NY) coated T-75 flasks (Corning, Corning, NY) using NSC  
532 media which consisted of DMEM/F12 (Gibco 11320033; Thermo Fischer Scientific,  
533 Waltham, MA) with 1X B-27 supplement (Gibco 12587010, Thermo Fischer Scientific,  
534 Waltham, MA) and 1X penicillin/streptomycin (Corning, Corning, NY). Twenty ng/ml  
535 EGF (PeproTech, Rocky Hill, NJ) and FGF (PeproTech, Rocky Hill, NJ) were added to  
536 the cell culture media every 2-3 days. Cells were cultured in a 37 °C 5% CO<sub>2</sub> incubator.  
537 Once a confluent layer was achieved, cells were detached using 0.25% Trypsin EDTA  
538 (Corning, Corning, NY) and frozen down for later use.

539           Once tumor lines were established, cells were grown as neurospheres using  
540 NSC media and Ultra-Low Attachment 6-well plates (Corning, Corning, NY).  
541 Neurospheres were dissociated using accutase (Innovative Cell Technologies, San  
542 Diego, CA). In total, six different mouse primary tumor lines were established: three  
543 NRAS and three PDGF.

544

## 545 **Patient-derived xenograft (PDX) cell line culture**

546 The patient-derived xenograft (PDX) cell lines were taken from the Mayo Clinic  
547 GBM PDX collection (managed by Dr. Jann Sarkaria, Mayo Clinic, Rochester, MN).  
548 Three mesenchymal PDX lines (GBM 16, 39 and 44) and three proneural PDX lines  
549 (GBM 64, 80 and 85) were selected to study their migration in organotypic mouse brain  
550 slice. Cells were cultured on Matrigel (354230; Corning, Corning, NY) coated tissue  
551 culture flasks in a 37 °C 5% CO<sub>2</sub> incubator. NSC media was used to culture PDX cell  
552 lines and 20 ng/ml EGF and FGF were added to the cell culture media every 2-3 days.

553

## 554 ***Ex vivo* confocal imaging of tumor-bearing brain slices**

555 Tumor-bearing mice were sacrificed when bioluminescence signals were around  
556  $5 \times 10^7$  radiance (p/sec/cm<sup>2</sup>/sr). Mice were euthanized in a CO<sub>2</sub> chamber and perfused  
557 transcardially with isotonic saline. Mouse brains were extracted and kept in chilled  
558 artificial cerebrospinal fluid (124 mM NaCl, 2.5 mM KCl, 2.0 mM MgSO<sub>4</sub>, 1.25 mM  
559 KH<sub>2</sub>PO<sub>4</sub>, 26 mM NaHCO<sub>3</sub>, 10 mM glucose). Coronal brain slices of thickness 300 μm  
560 were prepared using a vibratome (Leica Biosystems, Buffalo Grove, IL). Only one slice  
561 was used for live-cell imaging. Isolectin GS-IB4 (Alexa Fluor 568 Conjugate; Molecular  
562 Probes, Eugene, OR) was used to label the vasculature.

563 Before imaging, the slice was washed and transferred into a No. 0 glass bottom  
564 35 mm culture dish (P35G-0-20-C; MatTek, Ashland, MA). A tissue culture anchor (SHD  
565 42-15; Warner Instruments, Hamden, CT) was placed on top of the slice to prevent  
566 movement during imaging. The slice was then imaged on a Zeiss LSM 7 Live swept-  
567 field laser confocal microscope (Zeiss, Oberkochen, Germany) at 15-minute intervals for

568 up to 20 hours in humidified 5% CO<sub>2</sub> air at 37 °C. Images were collected with a 20x  
569 objective lens (Plan-ApoChromat 20X, 0.8 NA, Zeiss, Oberkochen, Germany). The  
570 number of Z stacks of several regions of interest was adjusted to ensure that the data  
571 acquisition of one frame in the time series was completed under 15 minutes (10-20  
572 planes with 10 µm z-step was typically used). Maximum intensity projections from  
573 multiple Z stacks were used to generate 2D images for quantitative morphological and  
574 trajectory analysis. Images were registered by an affine transformation using ImageJ  
575 StackReg plug-in (École Polytechnique Fédérale De Lausanne) to account for stage  
576 drift and tissue relaxation during time-lapse imaging.

577

#### 578 **Live-cell imaging of tumor cells in organotypic brain-slice culture**

579 Healthy mouse brain slices were prepared using the same method as tumor-  
580 bearing brain slices above. For experiments using GFP-positive mouse primary tumor  
581 lines, neurospheres were dissociated using accutase (Innovative Cell Technologies,  
582 San Diego, CA). The protocol of grafting cancer cells into the brain slice was described  
583 in details in our previous publication (Liu et al., 2019). Briefly, after creating a single cell  
584 suspension, 300,000 cells in 3 mL of media were plated onto the brain slice. The cells  
585 were co-cultured with the brain slice for 4 hours at 37 °C and 5% CO<sub>2</sub> before imaging to  
586 promote cell infiltration into the brain slice. Phenol-free NSC media +2% FBS (Gibco,  
587 Thermo Fischer Scientific, Waltham, MA) was used. The slices (Isolectin GS-IB4  
588 stained) were washed several times using cell culture media and transferred into a No.  
589 0 glass bottom 6-well plate (P06G-0-20-F; MatTek, Ashland, MA). The slices were  
590 imaged on a confocal microscope with a 10X objective lens (Plan-ApoChromat 10X,

591 0.45 NA, Zeiss, Oberkochen, Germany). Similar imaging protocol as mentioned above  
592 was applied.

593 For PDX cells, 500,000 – 800,000 cells were stained using DiO membrane dye  
594 (V22886; Thermo Fisher Scientific, Waltham, MA) for 5 minutes and then washed twice  
595 before plating onto the brain slice inside a 35mm tissue culture dish. The grafting of the  
596 cells to the brain slice was similar to the mouse primary cells described above. The  
597 slices were imaged on a confocal microscope using a 20X objective lens (Plan-  
598 ApoChromat 20X, 0.8 NA, Zeiss, Oberkochen, Germany). Similar imaging protocol was  
599 applied.

600 For both mouse primary tumor cells and PDX cells, we also acquired the  
601 maximum intensity projections from multiple Z stacks and performed image registration  
602 for further analysis for cell migration and morphology. Images were registered by an  
603 affine transformation using ImageJ StackReg plug-in (École Polytechnique Fédérale De  
604 Lausanne) to account for stage drift and tissue relaxation during time-lapse imaging.

605

### 606 **Single cell tracking and morphology analysis**

607 Single cell migration was tracked as previously described using a custom-written  
608 image segmentation algorithm in MATLAB (Bangasser et al., 2017; Klank et al., 2017).  
609 Using cell centroid coordinates, the mean squared displacement (MSD) of the cell  
610 trajectories over time was calculated using the time interval overlap method (Dickinson  
611 and Tranquillo, 1993). To quantify the dispersion of cells, the MSD over time was used  
612 to calculate the random motility coefficient  $\mu$  according to the equation ( $MSD(t)=4\mu t$ ;  
613 assuming 2-D geometry). Using segmented cell regions, cell area and cell aspect ratio,

614 defined as the ratio between the major and minor axis length of a fitted ellipse, were  
615 measured for each individual tracked cell. Distributions of random motility coefficients,  
616 cell area and cell aspect ratio for the different conditions were compared using the  
617 Kruskal-Wallis test, which is a non-parametric rank-based test.

618

### 619 **Bioluminescence imaging and analysis**

620 Animals were monitored for tumor development and progression using  
621 noninvasive bioluminescence imaging. Oncogene-injected animals were injected  
622 intraperitoneally with 100  $\mu$ l of 28.5 mg/ml luciferin (GoldBio, St. Louis, MO) prior to  
623 imaging. Mice were then anesthetized using 3% isoflurane and imaged on an IVIS50  
624 or IVIS100 instrument (Xenogen, Alameda, CA). Images were acquired ten minutes  
625 after injection with five minutes exposure time (Xenogen LivingImage Software,  
626 Alameda, CA). To avoid saturation, exposure time was reduced appropriately in fully  
627 grown tumors and accounted for in the analysis. BL images were processed using a  
628 custom written MATLAB algorithm where background signal was subtracted and pixels  
629 away from the tumor were set to zero. BL signal from each animal was then normalized  
630 to the initial time point when tumor was first detected.

631

### 632 **Quantification of proliferation of mouse primary tumor line**

633 To measure proliferation rate, 200,000 cells from each line were plated into an  
634 ultra-low adhesion 6-well plate and grown as neurospheres. Growth factors were added  
635 every 2-3 days. At day six, neurospheres were dissociated and cells counted. After

636 counting, the remaining cells were replated and resumed growing as neurospheres.  
637 Cells were also counted and replated at day nine and day 13. Experiment was repeated  
638 three times using each of five mouse primary tumor lines (three NRAS and two PDGF  
639 tumor lines). For each replicate, the average cell count for each cohort was calculated  
640 using the cell count from the different corresponding tumor lines.

641

## 642 **Traction force measurements**

643 Traction force measurements of mouse primary tumor lines were performed  
644 using traction force microscopy on polyacrylamide gels embedded with 0.2  $\mu\text{m}$  crimson  
645 fluorescent beads (Thermo Fischer Scientific, Waltham, MA) and coated with Type-I  
646 Collagen (Corning, Corning, NY). Collagen coated polyacrylamide gels of varying  
647 Young's modulus were prepared as previously described (Bangasser et al., 2017; Wang  
648 and Pelham, 1998). Briefly, 0.7, 4.6, and 9.3 kPa polyacrylamide polymer mixture with  
649 fluorescent beads were cast onto a No. 0 glass bottom dish then coated with Type-I  
650 Collagen using Sulfo-SANPAH (Thermo Fischer Scientific, Waltham, MA). Mouse  
651 primary tumor cells were dissociated from neurospheres and plated on prepared gels at  
652 low density (1-5 cells/ $\text{mm}^2$ ) using NSC media +2% FBS.

653 To measure force transmission, Traction Force Microscopy (TFM) was performed  
654 as previously described (Bangasser et al., 2017). Briefly, Nikon TiE and Ti2  
655 epifluorescence microscopes were used to image fluorescent bead positions before and  
656 after cell detachment via trypsin. A Zyla 5.5 sCMOS camera (Andor Technology,  
657 Belfast, United Kingdom) and a 40x/0.95NA Ph2 lens with 1.5x intermediate zoom (60x  
658 total magnification, 110 nm spatial sampling) was used. Cells were maintained at 37 °C

659 and 5% CO<sub>2</sub> for the duration of imaging using an Oko lab Bold Line top stage humidified  
660 incubator (Okolab, Ottaviano, Italy). At each stage position, a phase contrast image of  
661 the cell was acquired. Next, an image of fluorescent beads at the top surface of the gel  
662 was captured using a 575/25 nm LED and eGFP/mCherry filter set with LED  
663 fluorescence illumination from a SpectraX Light Engine (Lumencor, Beaverton, OR).  
664 Media in dishes was carefully removed, cells were detached with 0.25% trypsin/EDTA  
665 (Corning, Corning, NY), and fluorescence images of beads in the absence of cells were  
666 acquired at saved stage positions.

667 Using a previously described method (Bangasser et al., 2017), the displacement  
668 field was determined using particle image velocimetry (PIV) using the before and after  
669 bead images. A window size of 80-pixels (8.8 μm) square was used in PIV and a final  
670 lattice spacing of 20 pixels (2.2 μm) was achieved. Stress and displacement vectors  
671 were obtained by solving the inverse Boussinesq problem in Fourier space (Butler et al.,  
672 2002). By integrating the product of the stress and displacement vectors over the entire  
673 image, substrate strain energy was determined as previously described (Bangasser et  
674 al., 2017).

675

### 676 **Stochastic cell migration simulator**

677 The previously described (Bangasser et al., 2017; Klank et al., 2017) cell migration  
678 simulator (CMS v1.0) was used to simulate cells migration dynamics in response to  
679 changes in cell adhesion. The parameters used in the simulations are presented in  
680 Table S3. The number of adhesive clutches ( $N_c$ ) was adjusted to model the change in  
681 adhesion observed between PDGF/Proneural and NRAS/Mesenchymal tumors.  $N_c$  of

682 2500 and 7500 clutches were used to simulate PDGF/Proneural and  
683 NRAS/Mesenchymal tumor cells, respectively. Four hours of cell dynamics were  
684 simulated and the first hour was excluded from analysis to allow the system to reach  
685 steady state. Analysis was performed using a ten-minute sampling interval as previously  
686 described (Bangasser et al., 2017).

687

### 688 **Brownian dynamics tumor simulator (BDTS)**

689 The Brownian dynamics tumor simulator was used as previously described with  
690 modifications (Klank et al., 2018; Ray et al., 2018). In the present study, we extended  
691 the BTDS to 3-dimensional tumors and incorporated immune cells' dynamics as shown  
692 schematically in Figure 8A. Briefly, simulations started with 27 cancer cells, modeled as  
693 rigid sphere with radius ( $r_{\text{cancer}}$ ), placed in a 3x3x3 grid where the distance between  
694 each cancer cell (center-center) is  $3*r_{\text{cancer}}$ . In simulation including immune response,  
695 eight T cells, also modeled as rigid sphere with radius ( $r_{\text{CTL}}$ ), were included, and each  
696 was placed  $1.5*r_{\text{cancer}}$  away from a randomly selected cancer cell. At each simulation  
697 time step of 1 min, cancer and T cells are allowed to move randomly and grow as  
698 spheres with a linear volumetric growth rate. Movement and growth are rejected if the  
699 newly assigned space is already occupied by a like cell (i.e. no-overlap enforced  
700 between cancer cells and between T cells). However, a cancer cell and T cell contact  
701 occurs when a proposed cell movement put the distance between cell centers less than  
702 or equal ( $r_{\text{CTL}}+r_{\text{cancer}}$ ). The duration of the contact is ( $1/k_{\text{dissoc}}$ ), in this case 10 minutes.  
703 For every contact, both cancer cell and T cell take a "hit" that reduces their hit points  
704 (HP) by one. Both cancer cell and T cell have limited HP and once HP is depleted



705 (equals 0), the cell dies or become exhausted. For NRAS simulations, T cells were  
706 added to the tumor simulator and T cell-mediated killing was simulated. For PDGF  
707 simulation, only cancer cells were simulated. Cancer cell motility was estimated from *ex*  
708 *vivo* brain slice imaging of tumor cells (Figure 3C) and proliferation rate was estimated  
709 from the *in vitro* proliferation of mouse primary tumor lines (Figure 7D). The rest of  
710 parameters were estimated based on previous published work or used as an adjustable  
711 parameter (see Table S5).

712

### 713 **Statistical analysis**

714 Fisher's exact test was used to compare the mouse and human transcriptomic clusters.  
715 One-way analysis of variance was used to compare transcript levels. Analysis of  
716 covariance (ANCOVA) was used to compare between the two regression lines in Figure  
717 5C. Rank test, Kruskal-Wallis, one-way analysis of variance was used to compare  
718 single cell behaviors and IHC quantifications. Where appropriate, a subsequent Dunn-  
719 Sidak test for multiple comparisons was performed.

720

721 **DATA AND CODE AVAILABILITY:**

722 All data and codes are available on the Odde laboratory website ([oddelab.umn.edu](http://oddelab.umn.edu)) or  
723 on request from the corresponding author. Fastq files and the Cuffnorm output were  
724 deposited at Gene Expression Omnibus (GSE161154).

725

## 726 **AUTHORS CONTRIBUTION:**

727 GAS, BLK, BRT, SSR, DAL and DJO contributed to study initiation, conception and  
728 design.  
729 GAS, CJL, BCB and DJO contributed to writing the manuscript  
730 GAS, BCB and JMF contributed to developing mouse tumors  
731 GAS, SKR and ALS contributed to the analysis of transcriptomic data.  
732 GAS ran and analyzed the cell migration simulations  
733 GAS and CJL contributed to the acquisition and analysis of glioma cell migration  
734 GAS established tumor lines and performed traction force measurements  
735 GAS, BCB and HBC contributed to imaging and analysis of histological sections  
736 NG, PCR, DM and DJO contributed to the design and implementation of the Brownian  
737 Dynamics Tumor Simulator  
738 All authors contributed to the revisions of the manuscript

739

## 740 **CONFLICT OF INTEREST STATEMENTS:**

741 DAL is the co-founder and co-owner of several biotechnology companies including  
742 NeoClone Biotechnologies, Inc., Discovery Genomics, Inc. (recently acquired by  
743 immusoft, Inc.), B-MoGen Biotechnologies, Inc. (recently acquired by Bio-Techne  
744 Corporation), and Luminary Therapeutics, Inc. DAL holds equity in, serves as a Senior  
745 Scientific Advisor for and Board of Director member for Recombinetics, a genome  
746 editing company. DAL consults for Genentech, Inc., which is funding some of his  
747 research. The business of all these companies is unrelated to the contents of this  
748 manuscript.

749

## 750 **ACKNOWLEDGMENTS:**

751

752 The authors would like to thank Drs. Chris Wilke and Clark C. Chen for helpful  
753 discussion. This work was supported by National Institutes of Health grant U54  
754 CA210190 to SSR, DAL and DJO and U54CA210180 to JNS. DAL acknowledges the  
755 American Cancer Society Research Professor grant, the John and Jean Hedberg Brain  
756 Tumor Fund, and the Children's Cancer Research Fund. The authors acknowledge the  
757 Minnesota Supercomputing Institute (MSI) and University of Minnesota Genomic Center  
758 at the University of Minnesota for providing resources that contributed to the research  
759 results reported within this paper. We also acknowledge the Comparative Pathology,  
760 Cancer Bioinformatics, and Cytogenomics Shared Resources at the Masonic Cancer  
761 Center at the University of Minnesota for services.

762

## 763 REFERENCES:

- 764 Ahuja, D., Sáenz-Robles, M.T., and Pipas, J.M. (2005). SV40 large T antigen targets  
765 multiple cellular pathways to elicit cellular transformation. *Oncogene* *24*, 7729–7745.
- 766 Arima, Y., Hayashi, H., Kamata, K., Goto, T.M., Sasaki, M., Kuramochi, A., and Saya,  
767 H. (2010). Decreased expression of neurofibromin contributes to epithelial-  
768 mesenchymal transition in neurofibromatosis type 1. *Exp. Dermatol.* *19*.
- 769 Bangasser, B.L., Rosenfeld, S.S., and Odde, D.J. (2013). Determinants of maximal  
770 force transmission in a motor-clutch model of cell traction in a compliant  
771 microenvironment. *Biophys. J.* *105*, 581–592.
- 772 Bangasser, B.L., Shamsan, G.A., Chan, C.E., Opoku, K.N., Tüzel, E., Schlichtmann,  
773 B.W., Kasim, J.A., Fuller, B.J., McCullough, B.R., Rosenfeld, S.S., et al. (2017). Shifting  
774 the optimal stiffness for cell migration. *Nat. Commun.* *8*.
- 775 Bhat, K.P.L., Balasubramanian, V., Vaillant, B., Ezhilarasan, R., Hummelink, K.,  
776 Hollingsworth, F., Wani, K., Heathcock, L., James, J.D., Goodman, L.D., et al. (2013).  
777 Mesenchymal Differentiation Mediated by NF- $\kappa$ B Promotes Radiation Resistance in  
778 Glioblastoma. *Cancer Cell* *24*, 331–346.
- 779 Bloushtain-Qimron, N., Yao, J., Snyder, E.L., Shipitsin, M., Campbell, L.L., Mani, S.A.,  
780 Hu, M., Chen, H., Ustyansky, V., Antosiewicz, J.E., et al. (2008). Cell type-specific DNA  
781 methylation patterns in the human breast. *Proc. Natl. Acad. Sci. U. S. A.* *105*, 14076–  
782 14081.
- 783 Boissonnas, A., Fetler, L., Zeelenberg, I.S., Hugues, S., and Amigorena, S. (2007). In  
784 vivo imaging of cytotoxic T cell infiltration and elimination of a solid tumor. *J. Exp. Med.*  
785 *204*, 345–356.
- 786 Brennan, C.W., Verhaak, R.G.W., McKenna, A., Campos, B., Nounshmehr, H., Salama,  
787 S.R., Zheng, S., Chakravarty, D., Sanborn, J.Z., Berman, S.H., et al. (2013). The  
788 somatic genomic landscape of glioblastoma. *Cell* *155*, 462.
- 789 Brubaker, D.K., and Lauffenburger, D.A. (2020). Translating preclinical models to  
790 humans. *Science* (80- ). *367*, 742–743.
- 791 Butler, J.P., Tolić-Nørrelykke, I.M., Fabry, B., and Fredberg, J.J. (2002). Traction fields,  
792 moments, and strain energy that cells exert on their surroundings. *Am. J. Physiol. Cell*  
793 *Physiol.* *282*, C595-605.
- 794 Calinescu, A.A., Núñez, F.J., Koschmann, C., Kolb, B.L., Lowenstein, P.R., and Castro,  
795 M.G. (2015). Transposon mediated integration of plasmid DNA into the subventricular  
796 zone of neonatal mice to generate novel models of glioblastoma. *J. Vis. Exp.* 52443.
- 797 Chaffer, C.L., and Weinberg, R.A. (2011). A perspective on cancer cell metastasis.  
798 *Science* (80- ). *331*, 1559–1564.
- 799 Chan, C.E., and Odde, D.J. (2008). Traction dynamics of filopodia on compliant  
800 substrates. *Science* *322*, 1687–1691.
- 801 Dickinson, R.B., and Tranquillo, R.T. (1993). Optimal estimation of cell movement

- 802 indices from the statistical analysis of cell tracking data. *AIChE J.* 39, 1995–2010.
- 803 DiMilla, P.A., Barbee, K., and Lauffenburger, D.A. (1991). Mathematical model for the  
804 effects of adhesion and mechanics on cell migration speed. *Biophys. J.* 60, 15–37.
- 805 Doucette, T., Rao, G., Rao, A., Shen, L., Aldape, K., Wei, J., Dziurzynski, K., Gilbert,  
806 M., and Heimberger, A.B. (2013). Immune heterogeneity of glioblastoma subtypes:  
807 extrapolation from the cancer genome atlas. *Cancer Immunol. Res.* 1, 112–122.
- 808 Estabridis, H.M., Jana, A., Nain, A., and Odde, D.J. (2018). Cell Migration in 1D and 2D  
809 Nanofiber Microenvironments. *Ann. Biomed. Eng.* 46, 392–403.
- 810 Fehon, R.G., McClatchey, A.I., and Bretscher, A. (2010). Organizing the cell cortex: The  
811 role of ERM proteins. *Nat. Rev. Mol. Cell Biol.* 11, 276–287.
- 812 Freeman, S.A., Vega, A., Riedl, M., Collins, R.F., Ostrowski, P.P., Woods, E.C.,  
813 Bertozzi, C.R., Tammi, M.I., Lidke, D.S., Johnson, P., et al. (2018). Transmembrane  
814 Pickets Connect Cyto- and Pericellular Skeletons Forming Barriers to Receptor  
815 Engagement. *Cell* 172, 305-317.e10.
- 816 de Gooijer, M.C., Guillén Navarro, M., Bernards, R., Wurdinger, T., and van Tellingen,  
817 O. (2018). An Experimenter’s Guide to Glioblastoma Invasion Pathways. *Trends Mol.*  
818 *Med.* 24, 763–780.
- 819 Halle, S., Keyser, K.A., Stahl, F.R., Busche, A., Marquardt, A., Zheng, X., Galla, M.,  
820 Heissmeyer, V., Heller, K., Boelter, J., et al. (2016). In Vivo Killing Capacity of Cytotoxic  
821 T Cells Is Limited and Involves Dynamic Interactions and T Cell Cooperativity. *Immunity*  
822 44, 233–245.
- 823 Halle, S., Halle, O., and Förster, R. (2017). Mechanisms and Dynamics of T Cell-  
824 Mediated Cytotoxicity In Vivo. *Trends Immunol.* 38, 432–443.
- 825 Hanahan, D., and Weinberg, R.A. (2011). Hallmarks of cancer: The next generation.  
826 *Cell* 144, 646–674.
- 827 Hara, T., Chanoch-Myers, R., Mathewson, N.D., Myskiw, C., Atta, L., Bussema, L.,  
828 Eichhorn, S.W., Greenwald, A.C., Kinker, G.S., Rodman, C., et al. (2021). Interactions  
829 between cancer cells and immune cells drive transitions to mesenchymal-like states in  
830 glioblastoma. *Cancer Cell*.
- 831 Hoelzinger, D.B., Demuth, T., and Berens, M.E. (2007). Autocrine factors that sustain  
832 glioma invasion and paracrine biology in the brain microenvironment. *J. Natl. Cancer*  
833 *Inst.* 99, 1583–1593.
- 834 Hou, J.C., Shamsan, G.A., Anderson, S.M., McMahon, M.M., Tyler, L.P., Castle, B.T.,  
835 Heussner, R.K., Provenzano, P.P., Keefe, D.F., Barocas, V.H., et al. (2019). Modeling  
836 distributed forces within cell adhesions of varying size on continuous substrates.  
837 *Cytoskeleton* 76, 571–585.
- 838 Janda, E., Lehmann, K., Killisch, I., Jechlinger, M., Herzig, M., Downward, J., Beug, H.,  
839 and Grünert, S. (2002). Ras and TGF $\beta$  cooperatively regulate epithelial cell plasticity  
840 and metastasis: Dissection of Ras signaling pathways. *J. Cell Biol.* 156, 299–313.
- 841 Kim, D., Pertea, G., Trapnell, C., Pimentel, H., Kelley, R., and Salzberg, S.L. (2013).

- 842 TopHat2: Accurate alignment of transcriptomes in the presence of insertions, deletions  
843 and gene fusions. *Genome Biol.* *14*, R36.
- 844 Klank, R.L., Decker Grunke, S.A., Bangasser, B.L., Forster, C.L., Price, M.A., Odde,  
845 T.J., SantaCruz, K.S., Rosenfeld, S.S., Canoll, P., Turley, E.A., et al. (2017). Biphasic  
846 Dependence of Glioma Survival and Cell Migration on CD44 Expression Level. *Cell*  
847 *Rep.* *18*, 23–31.
- 848 Klank, R.L., Rosenfeld, S.S., and Odde, D.J. (2018). A Brownian dynamics tumor  
849 progression simulator with application to glioblastoma. *Converg. Sci. Phys. Oncol.* *4*,  
850 015001.
- 851 Koschmann, C., Calinescu, A.A., Nunez, F.J., Mackay, A., Fazal-Salom, J., Thomas, D.,  
852 Mendez, F., Kamran, N., Dzaman, M., Mulpuri, L., et al. (2016). ATRX loss promotes  
853 tumor growth and impairs nonhomologous end joining DNA repair in glioma. *Sci. Transl.*  
854 *Med.* *8*.
- 855 Krusche, B., Ottone, C., Clements, M.P., Johnstone, E.R., Goetsch, K., Lieven, H.,  
856 Mota, S.G., Singh, P., Khadayate, S., Ashraf, A., et al. (2016). EphrinB2 drives  
857 perivascular invasion and proliferation of glioblastoma stem-like cells. *Elife* *5*.
- 858 Kuleshov, M. V., Jones, M.R., Rouillard, A.D., Fernandez, N.F., Duan, Q., Wang, Z.,  
859 Koplev, S., Jenkins, S.L., Jagodnik, K.M., Lachmann, A., et al. (2016). Enrichr: a  
860 comprehensive gene set enrichment analysis web server 2016 update. *Nucleic Acids*  
861 *Res.* *44*, W90–W97.
- 862 Lefranc, F., Brotchi, J., and Kiss, R. (2005). Possible future issues in the treatment of  
863 glioblastomas: special emphasis on cell migration and the resistance of migrating  
864 glioblastoma cells to apoptosis. *J. Clin. Oncol.* *23*, 2411–2422.
- 865 Legg, J.W., and Isacke, C.M. (1998). Identification and functional analysis of the ezrin-  
866 binding site in the hyaluronan receptor, CD44. *Curr. Biol.* *8*, 705–708.
- 867 Liu, C.J., Shamsan, G.A., Akkin, T., and Odde, D.J. (2019). Glioma Cell Migration  
868 Dynamics in Brain Tissue Assessed by Multimodal Optical Imaging. *Biophys. J.* *117*.
- 869 Mao, P., Joshi, K., Li, J., Kim, S.H., Li, P., Santana-Santos, L., Luthra, S., Chandran,  
870 U.R., Benos, P. V., Smith, L., et al. (2013). Mesenchymal glioma stem cells are  
871 maintained by activated glycolytic metabolism involving aldehyde dehydrogenase 1A3.  
872 *Proc. Natl. Acad. Sci. U. S. A.* *110*, 8644–8649.
- 873 McLendon, R., Friedman, A., Bigner, D., Van Meir, E.G., Brat, D.J., Mastrogiannis,  
874 G.M., Olson, J.J., Mikkelsen, T., Lehman, N., Aldape, K., et al. (2008). Comprehensive  
875 genomic characterization defines human glioblastoma genes and core pathways.  
876 *Nature* *455*, 1061–1068.
- 877 Mekhdjian, A.H., Kai, F., Rubashkin, M.G., Prael, L.S., Przybyla, L.M., McGregor, A.L.,  
878 Bell, E.S., Barnes, J.M., DuFort, C.C., Ou, G., et al. (2017). Integrin-mediated traction  
879 force enhances paxillin molecular associations and adhesion dynamics that increase  
880 the invasiveness of tumor cells into a three-dimensional extracellular matrix. *Mol. Biol.*  
881 *Cell* *28*, 1467–1488.
- 882 Menke-van der Houven van Oordt, C.W., Gomez-Roca, C., van Herpen, C., Coveler,

- 883 A.L., Mahalingam, D., Verheul, H.M.W., van der Graaf, W.T.A., Christen, R., Rüttinger,  
884 D., Weigand, S., et al. (2016). First-in-human phase I clinical trial of RG7356, an anti-  
885 CD44 humanized antibody, in patients with advanced, CD44-expressing solid tumors.  
886 *Oncotarget* 7, 80046–80058.
- 887 Mooney, K.L., Choy, W., Sidhu, S., Pelargos, P., Bui, T.T., Voth, B., Barnette, N., and  
888 Yang, I. (2016). The role of CD44 in glioblastoma multiforme. *J. Clin. Neurosci.* 34, 1–5.
- 889 Naor, D., Nedvetzki, S., Golan, I., Melnik, L., and Faitelson, Y. (2002). CD44 in cancer.  
890 *Crit. Rev. Clin. Lab. Sci.* 39, 527–579.
- 891 Neftel, C., Laffy, J., Filbin, M.G., Hara, T., Shore, M.E., Rahme, G.J., Richman, A.R.,  
892 Silverbush, D., Shaw, M.L., Hebert, C.M., et al. (2019). An Integrative Model of Cellular  
893 States, Plasticity, and Genetics for Glioblastoma. *Cell* 178, 835-849.e21.
- 894 Núñez, F.J., Mendez, F.M., Kadiyala, P., Alghamri, M.S., Savelieff, M.G., Garcia-  
895 Fabiani, M.B., Haase, S., Koschmann, C., Calinescu, A.A., Kamran, N., et al. (2019).  
896 IDH1-R132H acts as a tumor suppressor in glioma via epigenetic up-regulation of the  
897 DNA damage response. *Sci. Transl. Med.* 11.
- 898 Ozawa, T., Riester, M., Cheng, Y.K., Huse, J.T., Squatrito, M., Helmy, K., Charles, N.,  
899 Michor, F., and Holland, E.C. (2014). Most human non-GCIMP glioblastoma subtypes  
900 evolve from a common proneural-like precursor glioma. *Cancer Cell* 26, 288–300.
- 901 Patel, A.P., Tirosh, I., Trombetta, J.J., Shalek, A.K., Gillespie, S.M., Wakimoto, H.,  
902 Cahill, D.P., Nahed, B. V., Curry, W.T., Martuza, R.L., et al. (2014). Single-cell RNA-seq  
903 highlights intratumoral heterogeneity in primary glioblastoma. *Science* (80-. ). 344,  
904 1396–1401.
- 905 Phillips, H.S., Kharbanda, S., Chen, R., Forrest, W.F., Soriano, R.H., Wu, T.D., Misra,  
906 A., Nigro, J.M., Colman, H., Soroceanu, L., et al. (2006). Molecular subclasses of high-  
907 grade glioma predict prognosis, delineate a pattern of disease progression, and  
908 resemble stages in neurogenesis. *Cancer Cell* 9, 157–173.
- 909 Pietras, A., Katz, A.M., Ekström, E.J., Wee, B., Halliday, J.J., Pitter, K.L., Werbeck, J.L.,  
910 Amankulor, N.M., Huse, J.T., and Holland, E.C. (2014). Osteopontin-CD44 signaling in  
911 the glioma perivascular niche enhances cancer stem cell phenotypes and promotes  
912 aggressive tumor growth. *Cell Stem Cell* 14, 357–369.
- 913 Polyak, K., and Weinberg, R.A. (2009). Transitions between epithelial and  
914 mesenchymal states: Acquisition of malignant and stem cell traits. *Nat. Rev. Cancer* 9,  
915 265–273.
- 916 Ponta, H., Sherman, L., and Herrlich, P.A. (2003). CD44: From adhesion molecules to  
917 signalling regulators. *Nat. Rev. Mol. Cell Biol.* 4, 33–45.
- 918 Prael, L.S., Bangasser, P.F., Stopfer, L.E., Hemmat, M., White, F.M., Rosenfeld, S.S.,  
919 and Odde, D.J. (2018). Microtubule-Based Control of Motor-Clutch System Mechanics  
920 in Glioma Cell Migration. *Cell Rep.* 25, 2591-2604.e8.
- 921 Prael, L.S., Stanslaski, M.R., Vargas, P., Piel, M., and Odde, D.J. (2020). Predicting  
922 Confined 1D Cell Migration from Parameters Calibrated to a 2D Motor-Clutch Model.  
923 *Biophys. J.* 118, 1709–1720.

- 924 Ray, A., Morford, R.K., Ghaderi, N., Odde, D.J., and Provenzano, P.P. (2018).  
925 Dynamics of 3D carcinoma cell invasion into aligned collagen. *Integr. Biol. (United*  
926 *Kingdom)* 10, 100–112.
- 927 Riggs, T., Walts, A., Perry, N., Bickle, L., Lynch, J.N., Myers, A., Flynn, J., Linderman,  
928 J.J., Miller, M.J., and Kirschner, D.E. (2008). A comparison of random vs. chemotaxis-  
929 driven contacts of T cells with dendritic cells during repertoire scanning. *J. Theor. Biol.*  
930 250, 732–751.
- 931 Scott, M.C., Temiz, N.A., Sarver, A.E., LaRue, R.S., Rathe, S.K., Varshney, J., Wolf,  
932 N.K., Moriarity, B.S., O'Brien, T.D., Spector, L.G., et al. (2018). Comparative  
933 transcriptome analysis quantifies immune cell transcript levels, metastatic progression,  
934 and survival in osteosarcoma. *Cancer Res.* 78, 326–337.
- 935 Stupp, R., Hegi, M.E., Gorlia, T., Erridge, S.C., Perry, J., Hong, Y.K., Aldape, K.D.,  
936 Lhermitte, B., Pietsch, T., Grujicic, D., et al. (2014). Cilengitide combined with standard  
937 treatment for patients with newly diagnosed glioblastoma with methylated MGMT  
938 promoter (CENTRIC EORTC 26071-22072 study): a multicentre, randomised, open-  
939 label, phase 3 trial. *Lancet. Oncol.* 15, 1100–1108.
- 940 Toole, B.P. (2009). Hyaluronan-CD44 interactions in cancer: Paradoxes and  
941 possibilities. *Clin. Cancer Res.* 15, 7462–7468.
- 942 Trapnell, C., Williams, B.A., Pertea, G., Mortazavi, A., Kwan, G., Van Baren, M.J.,  
943 Salzberg, S.L., Wold, B.J., and Pachter, L. (2010). Transcript assembly and  
944 quantification by RNA-Seq reveals unannotated transcripts and isoform switching during  
945 cell differentiation. *Nat. Biotechnol.* 28, 511–515.
- 946 Tsukita, S., Oishi, K., Sato, N., Sagara, J., and Kawai, A. (1994). ERM family members  
947 as molecular linkers between the cell surface glycoprotein CD44 and actin-based  
948 cytoskeletons. *J. Cell Biol.* 126, 391–401.
- 949 Verhaak, R.G.W., Hoadley, K.A., Purdom, E., Wang, V., Qi, Y., Wilkerson, M.D., Miller,  
950 C.R., Ding, L., Golub, T., Mesirov, J.P., et al. (2010). Integrated genomic analysis  
951 identifies clinically relevant subtypes of glioblastoma characterized by abnormalities in  
952 PDGFRA, IDH1, EGFR, and NF1. *Cancer Cell* 17, 98–110.
- 953 Vey, N., Delaunay, J., Martinelli, G., Fiedler, W., Raffoux, E., Prebet, T., Gomez-Roca,  
954 C., Papayannidis, C., Kebenko, M., Paschka, P., et al. (2016). Phase I clinical study of  
955 RG7356, an anti-CD44 humanized antibody, in patients with acute myeloid leukemia.  
956 *Oncotarget* 7, 32532–32542.
- 957 Wang, Y.-L., and Pelham, R.J. (1998). Preparation of a flexible, porous polyacrylamide  
958 substrate for mechanical studies of cultured cells. *Methods Enzymol.* 298, 489–496.
- 959 Wang, L.B., Karpova, A., Gritsenko, M.A., Kyle, J.E., Cao, S., Li, Y., Rykunov, D.,  
960 Colaprico, A., Rothstein, J.H., Hong, R., et al. (2021). Proteogenomic and metabolomic  
961 characterization of human glioblastoma. *Cancer Cell* 39, 509-528.e20.
- 962 Wang, Q., Hu, B., Hu, X., Kim, H., Squatrito, M., Scarpace, L., deCarvalho, A.C., Lyu,  
963 S., Li, P., Li, Y., et al. (2017). Tumor Evolution of Glioma-Intrinsic Gene Expression  
964 Subtypes Associates with Immunological Changes in the Microenvironment. *Cancer*  
965 *Cell* 32, 42-56.e6.



- 966 Wiesner, S.M., Decker, S.A., Larson, J.D., Ericson, K., Forster, C., Gallardo, J.L., Long,  
967 C., Demorest, Z.L., Zamora, E.A., Low, W.C., et al. (2009). De novo induction of  
968 genetically engineered brain tumors in mice using plasmid DNA. *Cancer Res.* 69, 431–  
969 439.
- 970 Yonemura, S. (1998). Ezrin/Radixin/Moesin (ERM) Proteins Bind to a Positively  
971 Charged Amino Acid Cluster in the Juxta-Membrane Cytoplasmic Domain of CD44,  
972 CD43, and ICAM-2. *J. Cell Biol.* 140, 885–895.
- 973 Yoshida, T., Matsuda, Y., Naito, Z., and Ishiwata, T. (2012). CD44 in human glioma  
974 correlates with histopathological grade and cell migration. *Pathol. Int.* 62, 463–470.
- 975
- 976

977 **FIGURE LEGENDS:**

978 **Figure 1. *De novo* induced GBM mouse models using immune competent mice**  
979 **recapitulate mesenchymal and proneural subtypes of human GBM.**

980 A) Schematic of mouse models. Plasmids encoding oncogenic drivers NRAS<sup>G12V</sup> or  
981 PDGF $\beta$  in combination with SV40LgTA were injected into P1 FVB mice to induce  
982 mesenchymal and proneural high grade gliomas, respectively. B) H&E and Ki67 IHC  
983 staining of NRAS and PDGF tumor sections. Scale bar: 50  $\mu$ m. C) Unsupervised  
984 hierarchical clustering of mRNA expression in induced mouse tumors and human IDH-  
985 WT GBM-TCGA. Arrows indicate conserved genes present in both mouse and human  
986 gene clusters as defined by systematic comparison of gene cluster membership  
987 between datasets. D) Quantification of relative expression of mouse gene clusters  
988 within the mouse dataset (top panel) and human GBM molecular subtypes (lower  
989 panel). E,F) Relative expression of key mesenchymal and proneural genes within  
990 mouse tumors (E) and human tumors (F). Solid and dashed lines represent mean and  
991 median values, respectively. Error bar represents S.E.M. + p <0.05, \* p <0.01, \*\*  
992 p <0.001, \*\*\* p <0.0001, \*\*\*\* p <0.00001.

993  
994 **Figure 2. Simulations of cell migration as a function of subtype based on CD44-**  
995 **mediated cellular adhesive clutches.**

996 A) Schematic of proneural (low CD44) and mesenchymal (medium CD44, i.e. optimal)  
997 subtypes. B) Wind-rose plots of simulated cell trajectories on different stiffnesses ( $K_{sub}$ =  
998 0.1, 1, 10 pN/nm). C) Simulated cell migration random motility coefficients show higher  
999 migration with increased (optimal) adhesion across a range of substrate stiffnesses. D)  
1000 Cell summed traction force exhibits higher traction forces with increased (optimal)  
1001 adhesion across all stiffnesses. E, F) Cell spread area and aspect ratio increase with  
1002 increased adhesion on substrate stiffnesses of 0.1 and 1 pN/nm. Error bars are S.E.M.

1003  
1004 **Figure 3. NRAS/Mesenchymal cells migrate faster, are more spread, and are more**  
1005 **polarized than PDGF/Proneural cells in *ex vivo* tumor-bearing brain tissue.**

1006 A) Representative *ex vivo* fluorescent montage of GFP-tagged tumor cells (green) and  
1007 blood vessels staining using isolectin B4 (magenta). B) Wind rose plots of  
1008 NRAS/Mesenchymal and PDGF/Proneural migrating tumor cell migration trajectories  
1009 (N=46). C) NRAS/Mesenchymal cancer cell motility is faster than for PDGF/proneural  
1010 cancer cells. D&E) NRAS/Mesenchymal cancer cells are more spread and polarized  
1011 than PDGF/Proneural cells as evidenced by larger spread area and aspect ratio. Solid  
1012 and dashed lines represent mean and median, respectively. N represents the number of  
1013 individual cells tracked from 3 mice from each cohort. Error bars are S.E.M. +p <0.05, \*  
1014 p <0.01, \*\* p <0.001, \*\*\* p <0.0001, \*\*\*\* p <0.00001.

1015  
1016 **Figure 4. Cancer cell migration is subtype specific and independent of the tumor**  
1017 **microenvironment and species.**

1018 A) Six representative images of primary isolated cells from each of the two mouse tumor  
1019 subtypes (3 NRAS and 3 PDGF). GFP-tagged tumor cells (green) and blood vessels  
1020 staining using isolectin B4 (magenta). B) NRAS/Mesenchymal primary isolated tumor  
1021 cancer cells migrate faster than PDGF/Proneural primary isolated cancer cells in normal

1022 mouse brain tissue as measured by random motility coefficient, see Video S2. C&D)  
1023 Quantification of cell spread area and cell aspect ratio showing that  
1024 NRAS/Mesenchymal cancer cells are more spread (C) and tend to be somewhat more  
1025 polarized (D),  $p=0.075$ , than PDGF/Proneural cancer cells in healthy brain slices. E) Six  
1026 representative images of proneural and mesenchymal PDX lines cells in healthy mouse  
1027 brain tissue. Labeled tumor cells using DiO membrane dye (green) and blood vessel  
1028 staining using isolectin B4 (magenta). F) Mesenchymal PDX cells migrate faster than  
1029 proneural PDX cells in normal mouse brain tissue as measured by random motility  
1030 coefficient, see Video S3. G&H) Quantification of cell spread area and cell aspect ratio  
1031 showing that mesenchymal PDX cells are more spread (G) and are more polarized (H)  
1032 than proneural PDX cells in healthy brain slices. Solid and dashed lines represent mean  
1033 and median values respectively. N represents the number of individual cells tracked  
1034 from 3 mouse primary cell lines from each cohort. Error bars are S.E.M. +p <0.05, \* p  
1035 <0.01, \*\* p<0.001, \*\*\* p<0.0001, \*\*\*\* p<0.00001.

1036  
1037 **Figure 5. NRAS/Mesenchymal cancer cells generate larger traction forces *in vitro***  
1038 **on 2D hydrogels and *ex vivo* in brain slices than PDGF/Proneural cancer cells.** A)  
1039 Representative phase contrast images and traction force magnitude heatmaps on type I  
1040 collagen-coated polyacrylamide hydrogels across different substrate stiffnesses. B)  
1041 NRAS/Mesenchymal cancer cells (red) generate higher traction forces as measured by  
1042 total strain energy relative to PDGF/Proneural (blue) cancer cells. Measurement noise is  
1043 presented (grey) across all stiffnesses. C) Similar to mouse brain slices,  
1044 NRAS/Mesenchymal cancer cells (red) cultured on collagen-coated polyacrylamide  
1045 hydrogels have larger spread area than PDGF cancer cells (blue). D &E) Tissue  
1046 deformation visualized using temporal-color coding using 2 hours time-lapse and 15  
1047 minutes time interval. Mesenchymal PDX cells generate larger deformations of mouse  
1048 brain capillaries (E) than proneural PDX cells shown in (D). Scale bar = 20  $\mu\text{m}$ , and  
1049 inset scale bar = 10  $\mu\text{m}$ . Solid and dashed lines represent mean and median values,  
1050 respectively. N represents individual cell measurements from three mouse primary cell  
1051 lines from each cohort with a minimum of two technical replicates. Error bars are S.E.M.  
1052 +p <0.05, \* p <0.01, \*\* p<0.001, \*\*\* p<0.0001, \*\*\*\* p<0.00001.

1053  
1054 **Figure 6. NRAS/Mesenchymal mice live longer than PDGF/Proneural mice.** A)  
1055 Kaplan-Meier plot of animal survival for NRAS/Mesenchymal and PDGF/Proneural  
1056 tumor-bearing mice shows extended survival of the NRAS/Mesenchymal cohort. Log  
1057 rank Mantel-Cox test  $p<0.00001$ . B) Bioluminescence imaging (BLI) of  
1058 NRAS/Mesenchymal mice shows slower growing tumors relative to PDGF/Proneural  
1059 mice. C) Quantification of BLI integrated intensity for the two cohorts. Normalized BLI  
1060 intensity for all data points and linear fits for each cohort. PDGF/Proneural  
1061 slope= $0.127\pm 0.01191$  and NRAS/Mesenchymal slope= $0.0716\pm 0.00343$ , D) Normalized  
1062 cell count of primary isolated mouse tumor cells showing no significant difference in  
1063 proliferation rate *in vitro* using neurosphere culture. Solid and dashed lines represent  
1064 mean and median values, respectively. Error bars are S.E.M. +p <0.05, \* p <0.01, \*\*  
1065 p<0.001, \*\*\* p<0.0001, \*\*\*\* p<0.00001.

1066

1067 **Figure 7. NRAS/Mesenchymal tumors are relatively immunologically “hot” and**  
1068 **PDGF/Proneural tumors are immunologically “cold,” consistent with human GBM**  
1069 **subtypes.** A, B) Clustering analysis of immune activators and suppressors previously  
1070 reported in human GBM (Doucette *et al.*, 2013). Similar to mesenchymal GBM,  
1071 NRAS/Mesenchymal tumors have elevated immune activator and suppressor  
1072 expression relative to normal brain tissue and PDGF/Proneural tumors. C) Expression  
1073 of immune cell surface marker genes in mouse (top) and human (bottom) tumors shows  
1074 elevated expression in NRAS/Mesenchymal tumors and human mesenchymal GBM  
1075 tumors relative to PDGF/Proneural and human proneural GBM tumors. D)  
1076 Immunohistochemistry (IHC) confirms elevated immune cell infiltration in NRAS tumors  
1077 and associated elevation of immune-mediated killing of tumor cells. E,F,G,H)  
1078 Quantification of IHC images using a k-means clustering algorithm. Solid and dashed  
1079 lines represent mean and median values, respectively. Error bars are S.E.M. +p <0.05 \*  
1080 p <0.01, \*\* p<0.001, \*\*\* p<0.0001, \*\*\*\* p<0.00001.

1081  
1082 **Figure 8. Brownian dynamics tumor simulator (BDTS) of 3D NRAS/Mesenchymal**  
1083 **and PDGF/Proneural tumors.** A) Schematic showing a diagram of the model. B)  
1084 Simulator output at day 0 and day 16 for PDGF and NRAS simulations. In NRAS  
1085 simulations, dead cancer cells are larger grey spheres and T cells are smaller black  
1086 spheres, see Video S4. C) Cancer cell count over time showing the difference in tumor  
1087 growth in the presence of T cells with simulated PDGF/Proneural tumors growing faster  
1088 than NRAS/mesenchymal tumors. D) Cartoon summary of the main findings depicting  
1089 the relationship between molecular subtypes, cellular adhesion, cell migration, and  
1090 immune response.

1091

## 1092 SUPPLEMENTARY FIGURE AND TABLES LEGENDS:

1093 **Figure S1. Unsupervised clustering of mouse tumor and healthy brain tissue**  
1094 **transcriptomic profiles and pathway enrichment analysis.** A) Heatmap showing  
1095 expression profile of NRAS and PDGF tumors and healthy mouse brain tissues.  
1096 Heatmap shows existence of three gene clusters: Tumor-specific cluster, normal brain  
1097 tissue specific cluster and NRAS tumor-specific cluster. B,C&D) Gene ontology analysis  
1098 of gene clusters was performed using EnrichR.

1099  
1100 **Figure S2. Clustering analysis of mouse and human tumors using gene**  
1101 **signatures associated with classical, mesenchymal, and proneural subtypes.** A)  
1102 Heatmap shows the clustering of human GBM samples using subtype-specific gene  
1103 signatures. B) Heatmap shows the clustering of mouse tumors using subtype-specific  
1104 gene signatures. C&D) Quantification of subtype gene signatures within human GBM  
1105 subtypes and NRAS and PDGF mouse tumors. Solid and dashed lines represent mean  
1106 and median values respectively. Error bars are S.E.M. +p <0.05, \* p <0.01, \*\* p<0.001,  
1107 \*\*\* p<0.0001, \*\*\*\* p<0.00001.

1108  
1109 **Figure S3. Differential expression analysis of cell migration genes.** Volcano plot  
1110 depicting  $-\log_{10}(\text{adj } p \text{ value})$  calculated using FDR adjusted Student's t test versus  
1111  $\log_2(\text{average FC})$  for individual genes in A) mouse tumors and B) human TCGA-GBM

1112  
1113 **Figure S4. Quantification of single cell migration and cell morphology.** A, B, & C)  
1114 *Ex vivo* migration and morphology data from each individual animal. D, E, & F)  
1115 Migration and morphology data for each individual mouse primary tumor line in mouse  
1116 organotypic brain slice. G, H, & I) Migration and morphology data for each individual  
1117 PDX line in mouse organotypic brain slice.

1118  
1119 **Figure S5. BL image sequences showing tumor regression in some rare cases.** All  
1120 three surviving mice in NRAS cohort showed tumor regression.

1121  
1122 **Figure S6. Expression of immune checkpoint genes within mouse tumors.**  
1123 Expression of immune checkpoint genes were upregulated in NRAS tumors relative to  
1124 PDGF tumors (B) similar to human mesenchymal and proneural (A).

1125  
1126 **Video S1.** Related to Figure 3. GFP-positive NRAS and PDGF tumor cells migrating in  
1127 tumor bearing brain slices over 10 hours. Green shows tumor cells and magenta shows  
1128 blood vasculature. Scale bar: 100  $\mu\text{m}$ .

1129  
1130 **Video S2.** Related to Figure 4A. GFP-positive NRAS and PDGF primary tumor cells  
1131 migrating in mouse organotypic brain slice over 16 hours. Green shows tumor cells and  
1132 magenta shows blood vasculature. Scale bar: 100  $\mu\text{m}$ .

1133  
1134 **Video S3.** Related to Figure 4D. Proneural and mesenchymal human PDX GBM cells  
1135 migrating in mouse organotypic brain slice over 16 hours. Green shows tumor cells

1136 stained using green DiO membrane dye and magenta shows blood vasculature. Scale  
1137 bar: 100  $\mu$ m.

1138

1139 **Video S4.** Related to Figure 8. Brownian dynamics tumor simulator output showing  
1140 simulated tumor growth.

1141

1142 **Table S1.** Related to Figure 1. FPKM expression of mouse tumors and healthy brain  
1143 tissues.

1144

1145 **Table S2.** Related to Figure 1C. List of genes identified in each cluster (MC1, MC2,  
1146 MC3, HC1, HC2, HC4).

1147

1148 **Table S3.** Related to Figure 2. List of cell migration simulator parameter values.

1149

1150 **Table S4.** Related to Figure 4. Characteristics of patient-derived xenograft (PDX) lines  
1151 used in this study.

1152

1153 **Table S5.** Related to Figure 8. List of Brownian dynamics tumor simulator parameter  
1154 values.

1155

1156 **Table S6.** List of antibodies and reagents used in IHC staining.

1157

1158 **Table S3:** Cell migration simulator parameter values

| Symbol       | Parameter                              | Value                  |
|--------------|----------------------------------------|------------------------|
| $N_m$        | Total number of motors                 | 10,000                 |
| $N_c$        | Total number of clutches               | 250; 750               |
| $A_{tot}$    | Total possible actin protrusion length | 100 $\mu\text{m}$      |
| $v_p^*$      | Maximum actin polymerization velocity  | 200 nm/s               |
| $k_{mod}^*$  | Maximum module birth rate              | $1 \text{ s}^{-1}$     |
| $k_{cap}$    | Module capping rate                    | $0.001 \text{ s}^{-1}$ |
| $l_{in}$     | Initial module length                  | 5 $\mu\text{m}$        |
| $l_{min}$    | Minimum module length                  | 0.1 $\mu\text{m}$      |
| $K_{cell}$   | Cell spring constant                   | 10,000 pN/nm           |
| $n_{c,cell}$ | Number of cell body clutches           | 10;                    |
| $n_m^*$      | Maximum number of module motors        | $0.1 * N_c$            |
| $F_m$        | Motor stall force                      | 2 pN                   |
| $v_m^*$      | Unloaded motor velocity                | 120 nm/s               |
| $n_c^*$      | Maximum number of module clutches      | 75; 750                |
| $k_{on}$     | Clutch on-rate                         | $1 \text{ s}^{-1}$     |
| $k_{off}^*$  | Clutch unloaded off-rate               | $0.1 \text{ s}^{-1}$   |
| $K_c$        | Clutch spring constant                 | 0.8 pN/nm              |
| $F_b$        | Characteristic clutch rupture force    | 2 pN                   |
| $K_s$        | Substrate spring constant              | Variable               |

1160 **Table S4:** Characteristics of patient-derived xenograft (PDX) lines used in this study

| GBM   | Xenograft start | Sex | Molecular subtype<br>(RNAseq) |
|-------|-----------------|-----|-------------------------------|
| GBM16 | 2002            | F   | mesenchymal                   |
| GBM39 | 2003            | M   | mesenchymal                   |
| GBM44 | 2003            | F   | mesenchymal                   |
| GBM64 | 2006            | F   | proneural                     |
| GBM80 | 2007            | M   | proneural                     |
| GBM85 | 2008            | M   | proneural                     |

1161



1162 **Table S5: Brownian dynamics tumor simulator parameters values**

| Parameter Name            | Parameter                   | Value   | Units                     | Reference                                     |
|---------------------------|-----------------------------|---------|---------------------------|-----------------------------------------------|
| Cancer cell radius        | $r_{\text{cancer}}$         | 10      | $\mu\text{m}$             | This study                                    |
| T cell radius             | $r_{\text{CTL}}$            | 3       | $\mu\text{m}$             | This study                                    |
| Cancer cell motility      | $D_{\text{cancer}}$         | 7.8; 42 | $\mu\text{m}^2/\text{h}$  | This study                                    |
| T cell motility           | $D_{\text{CTL}}$            | 300     | $\mu\text{m}^2/\text{hr}$ | (Boissonnas et al., 2007; Halle et al., 2016) |
| Cancer cell proliferation | $\rho_{\text{cancer}}$      | 0.5     | 1/d                       | This study                                    |
| T cell proliferation      | $\rho_{\text{CTL}}$         | 1       | 1/d                       | (Riggs et al., 2008)                          |
| Contact duration          | $1/k_{\text{dissoc}}$       | 10      | min                       | (Halle et al., 2016, 2017)                    |
| Cancer cell HP*           | $\text{HP}_{\text{cancer}}$ | 1       | contacts                  | (Halle et al., 2016)                          |
| T cell HP*                | $\text{HP}_{\text{CTL}}$    | 20      | contacts                  | Unknown, adjustable                           |

1184 **Table S6:** IHC antibodies and reagents used in Figure 1A and Figure 7D

| IHC               | Antibody | Antigen retrieval | Blocking               | Detection              |
|-------------------|----------|-------------------|------------------------|------------------------|
| Ki67              | CRM325   | High pH EDTA      | Dako protein block     | Dako rabbit envision   |
| CD3a              | A0452    | High pH EDTA      | Dako protein block     | Biocare rat detection  |
| IBA-1             | AB107159 | Low pH citrate    | Dako protein block     | Biocare goat detection |
| Cleaved Caspase-3 | Asp175   | High pH EDTA      | Dako protein block     | Dako rabbit envision   |
| Granzyme B        | D6E9W    | Low pH citrate    | Vectastain, goat serum | Vectastain ABC-HRP     |

1185

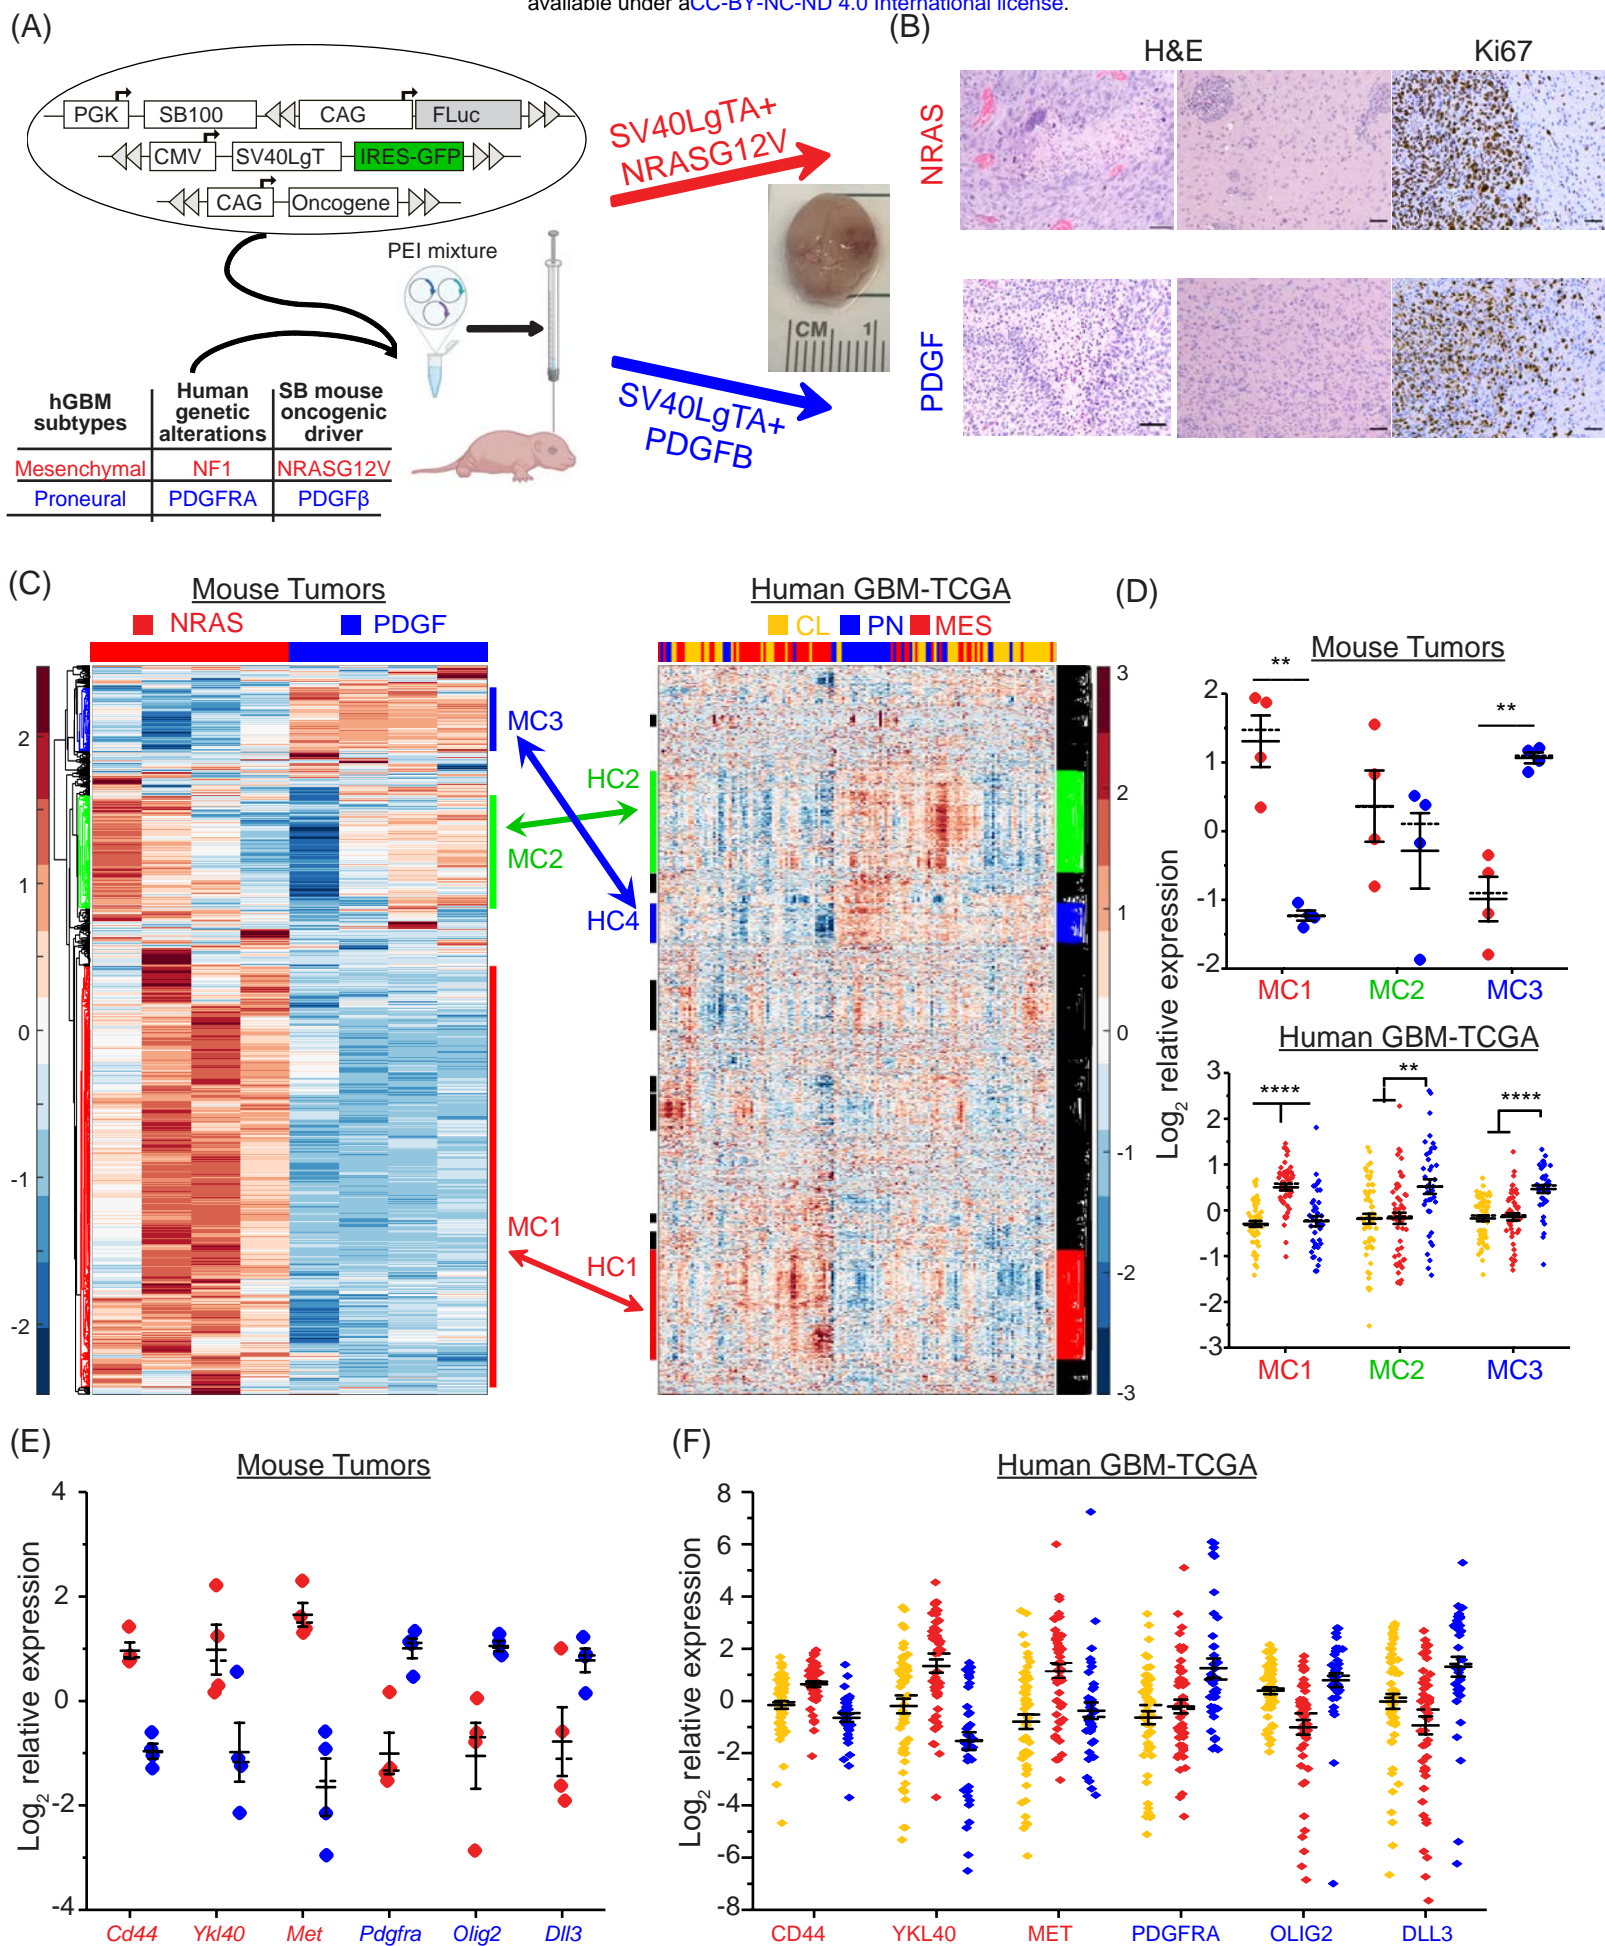

## Figure 2

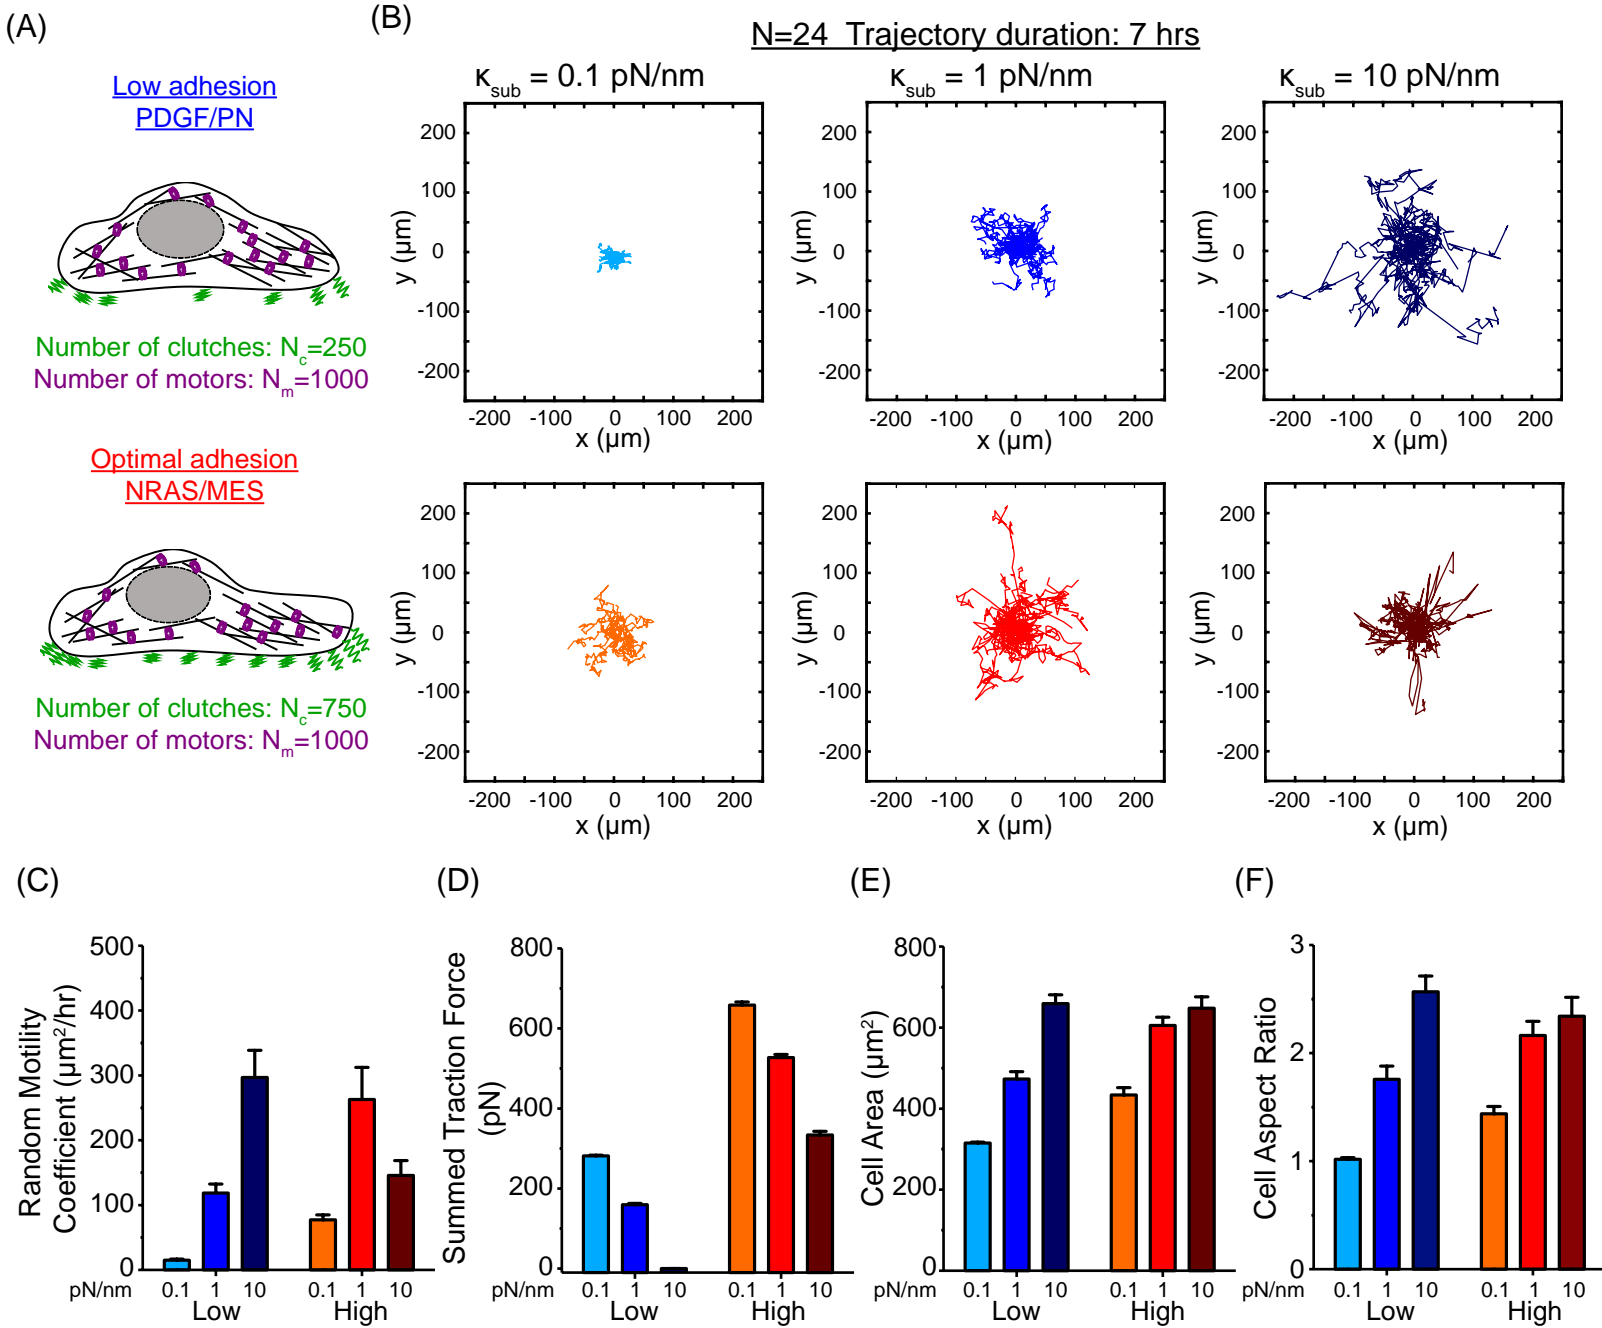

**Figure 3**

(A)

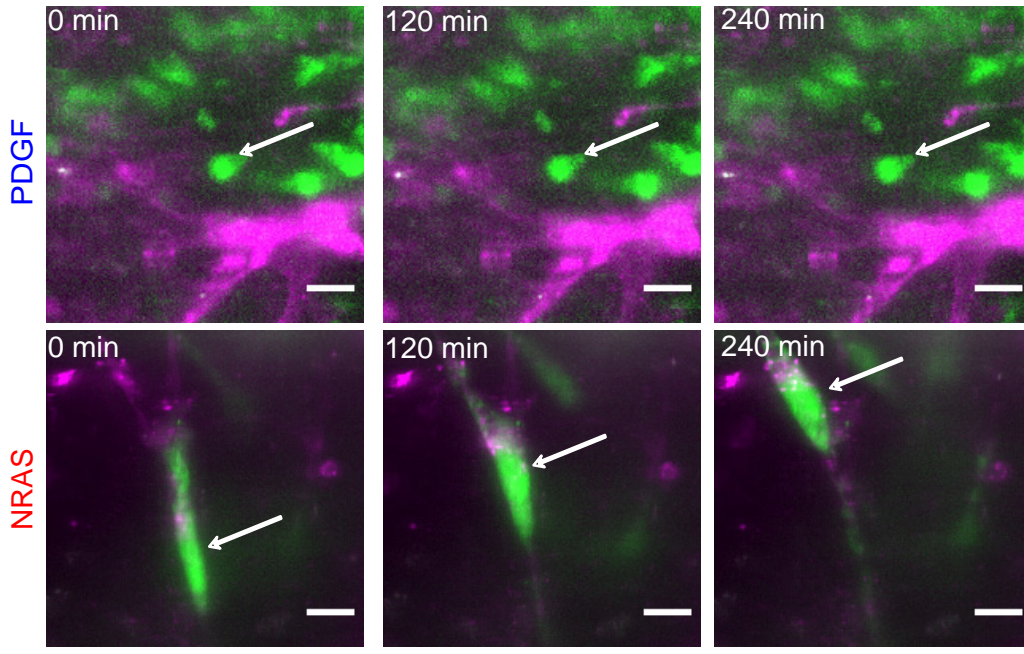

(B) **N=46: trajectory duration 3hrs**

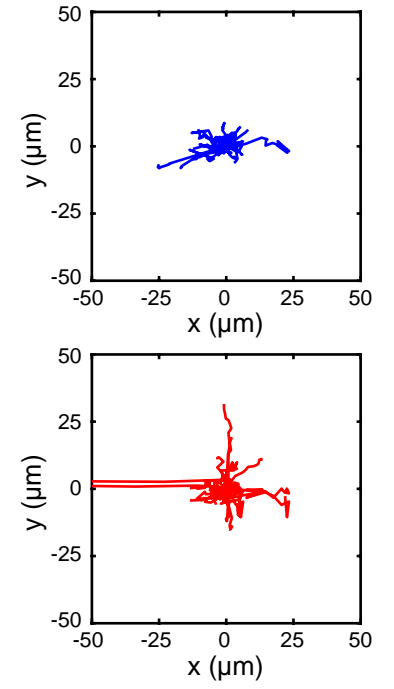

(C)

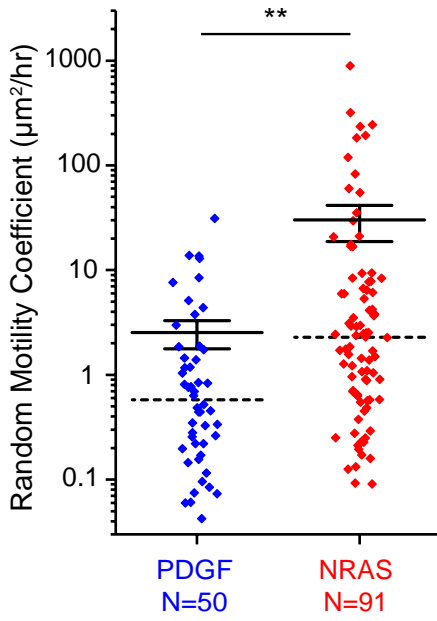

(D)

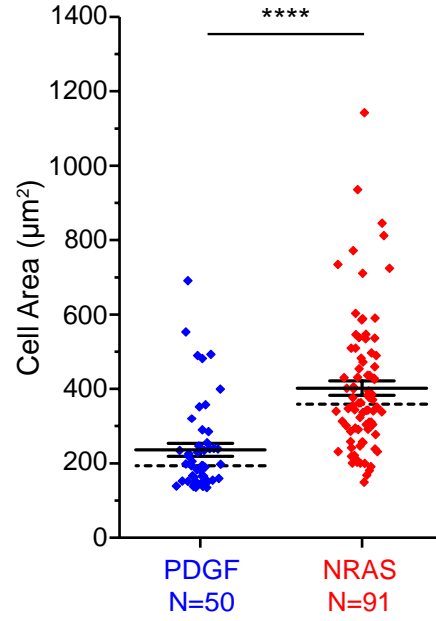

(E)

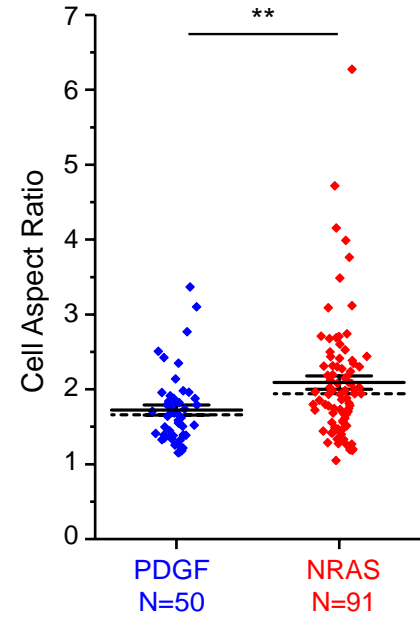

Figure 4

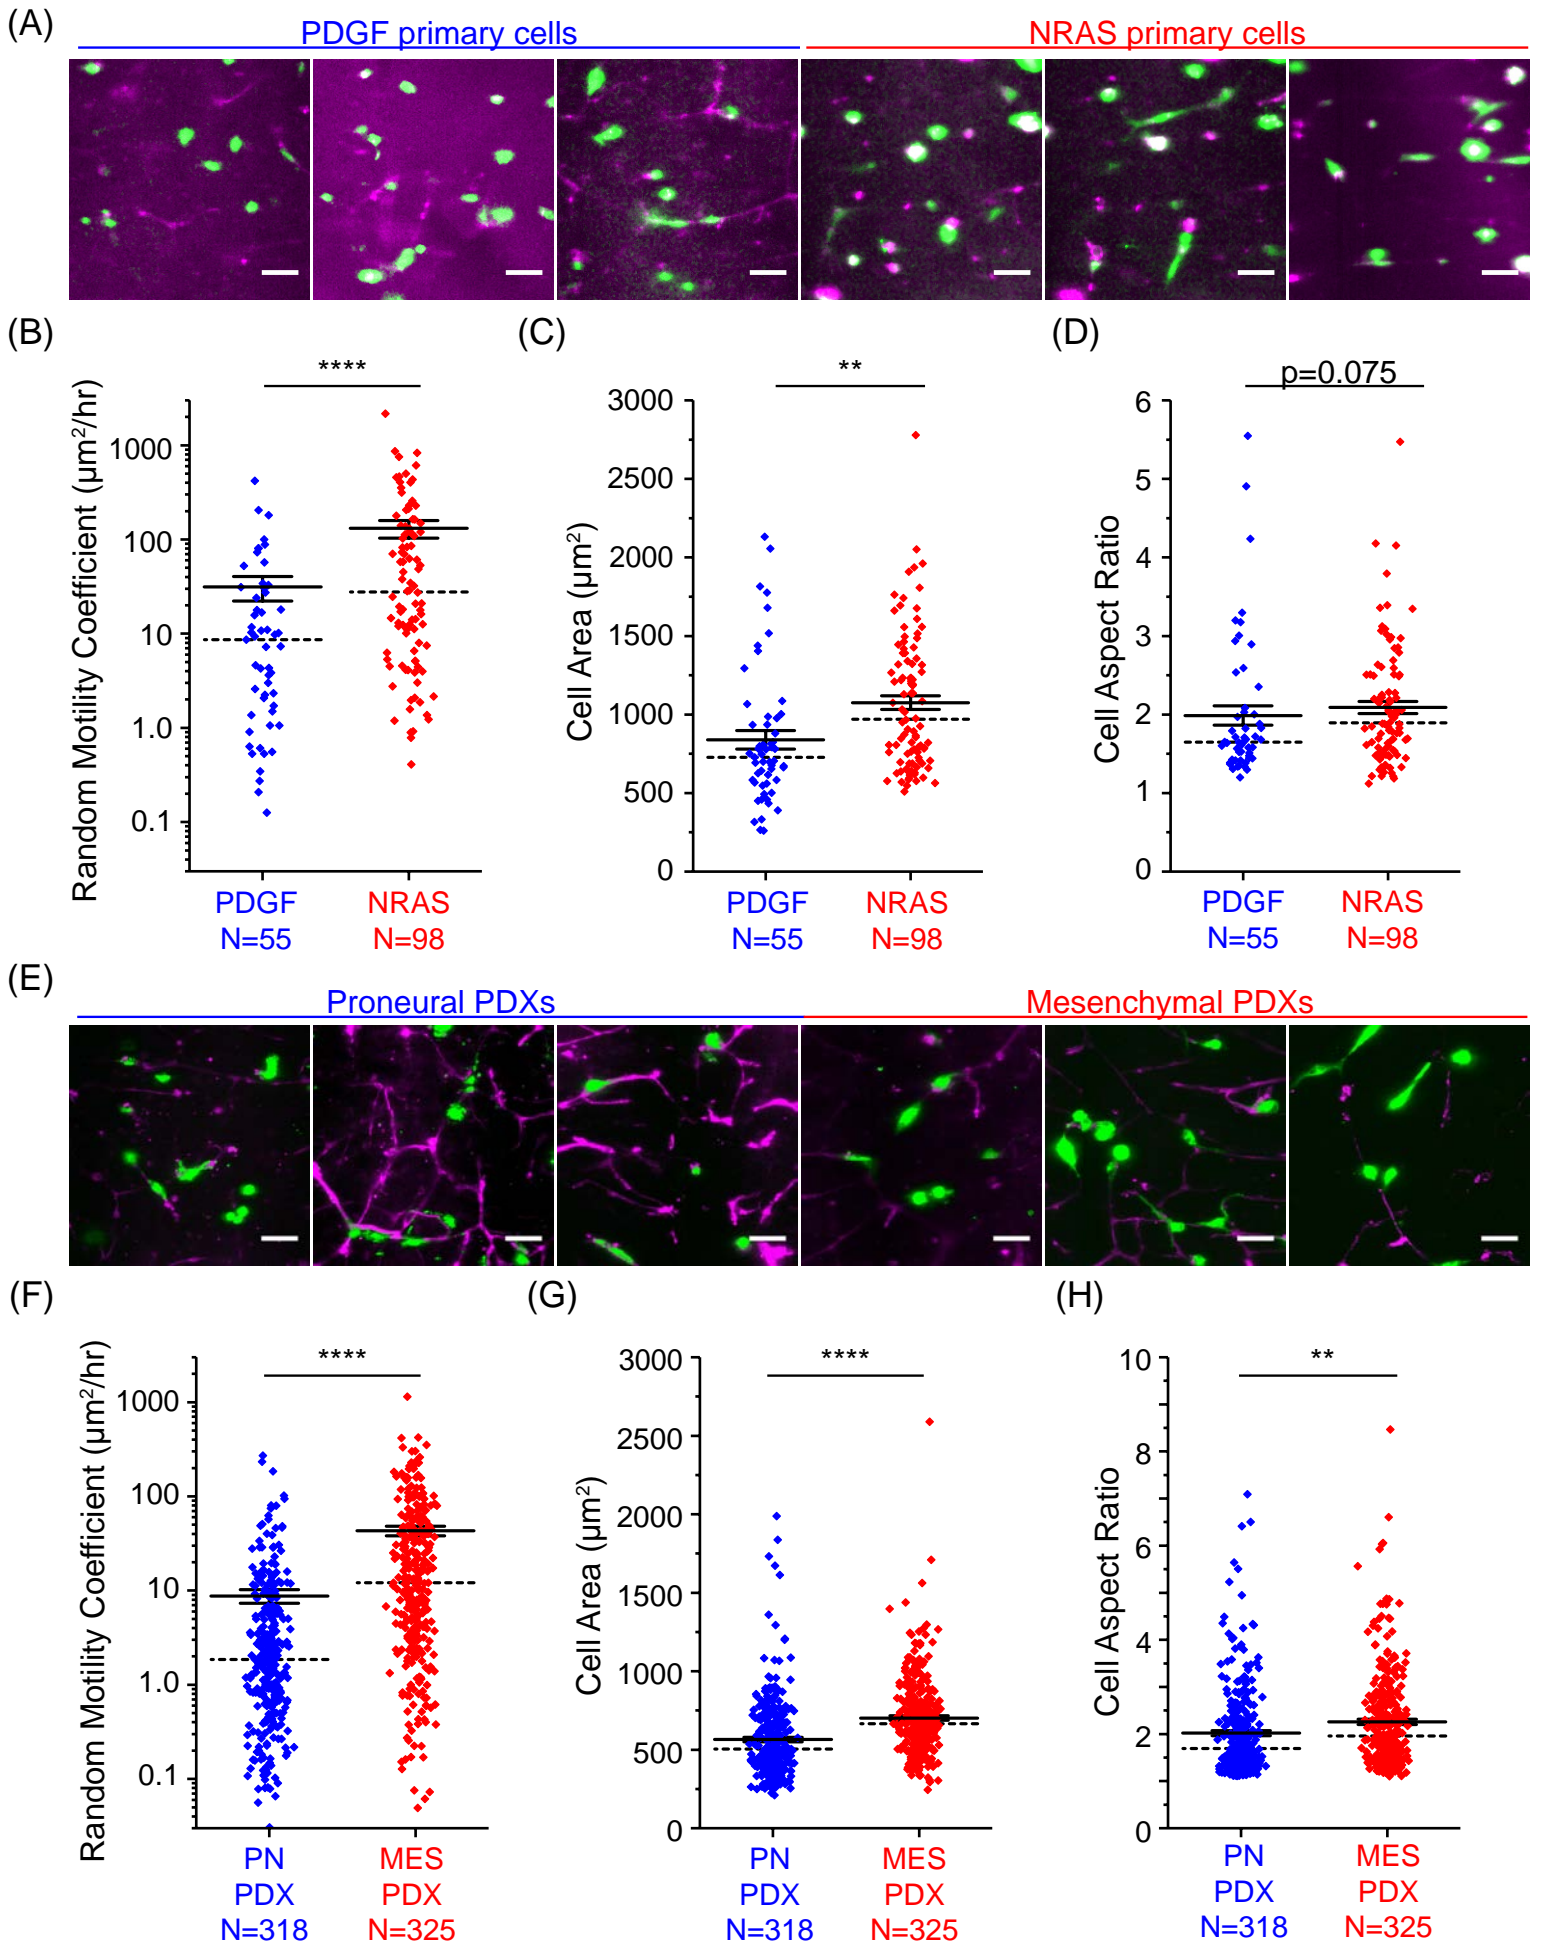

**Figure 5**

(A)

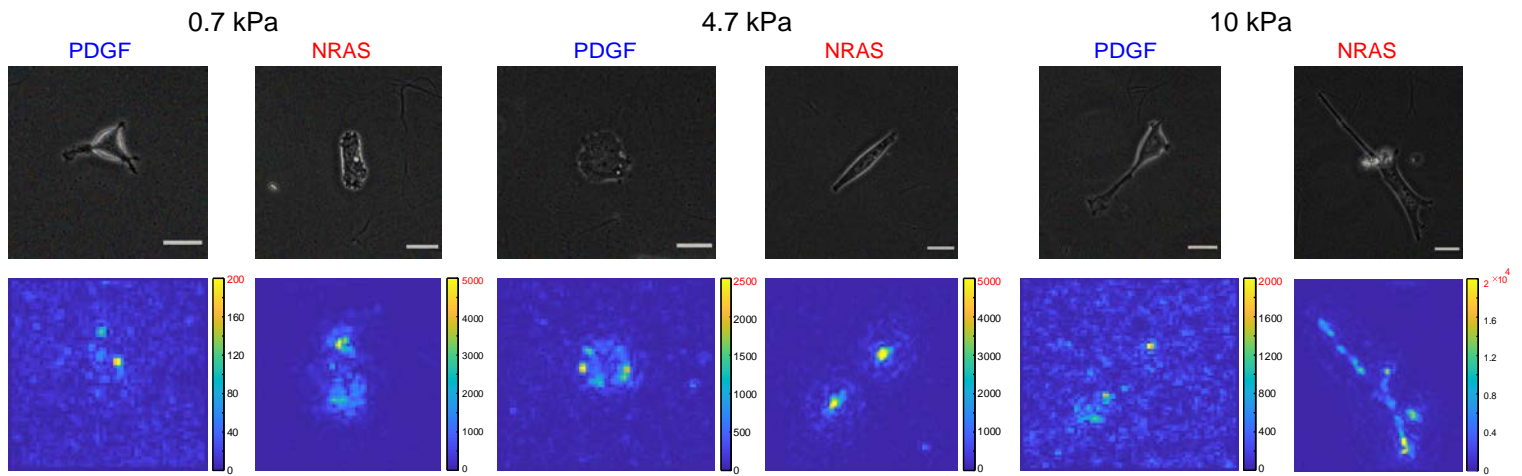

(B)

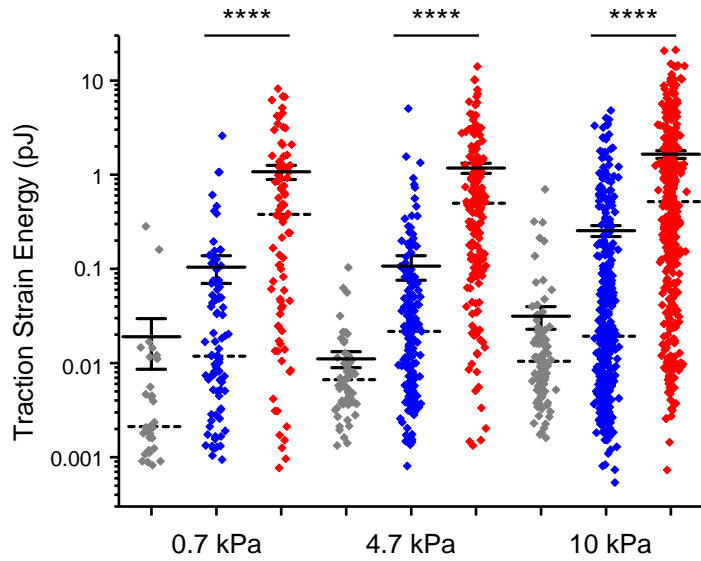

(C)

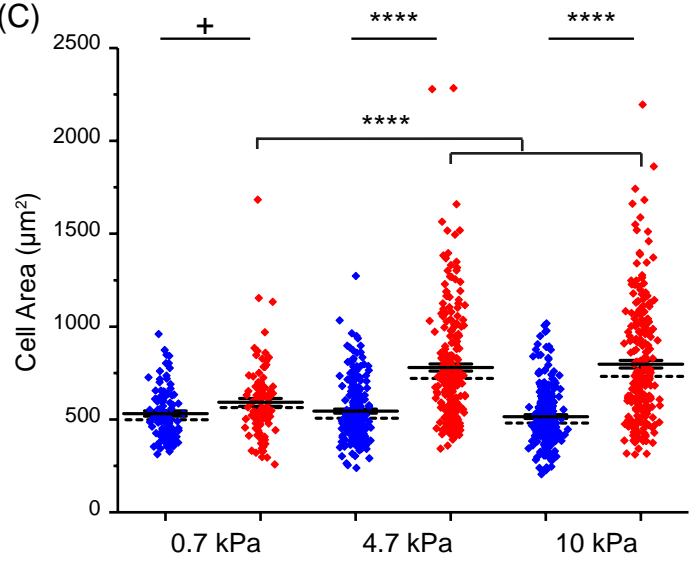

(D)

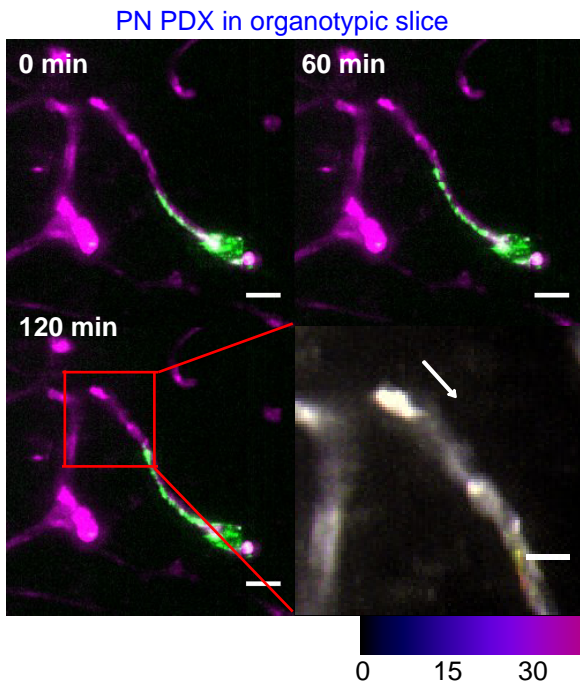

(E)

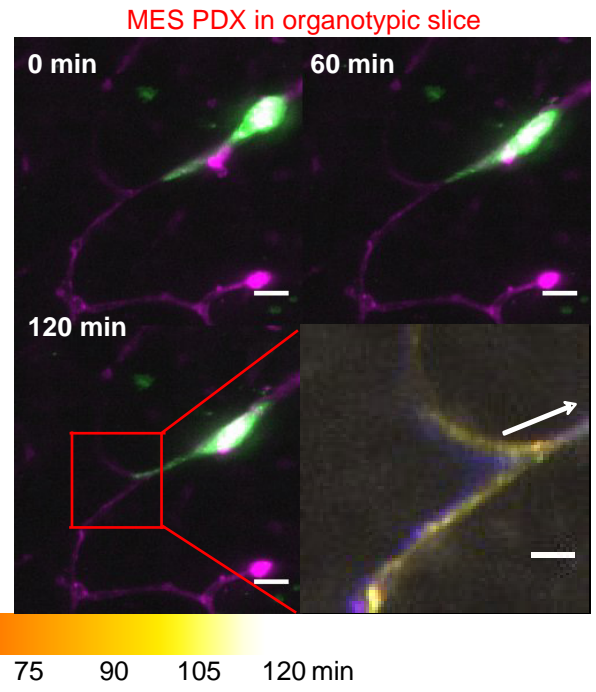

**Figure 6**

(A)

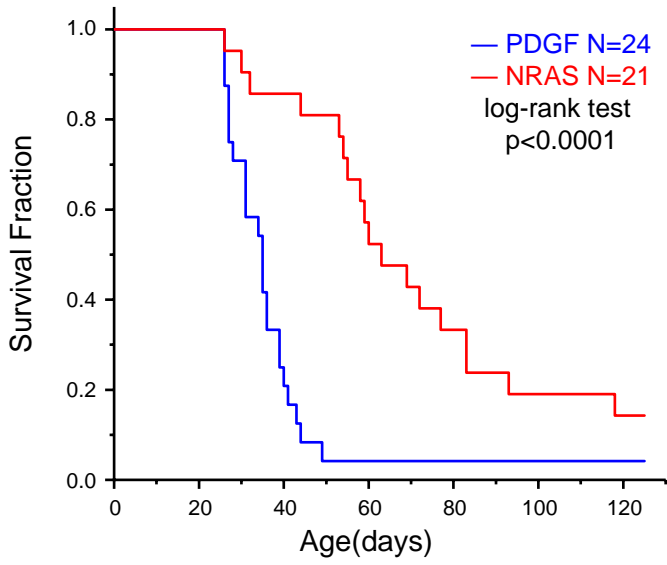

(B)

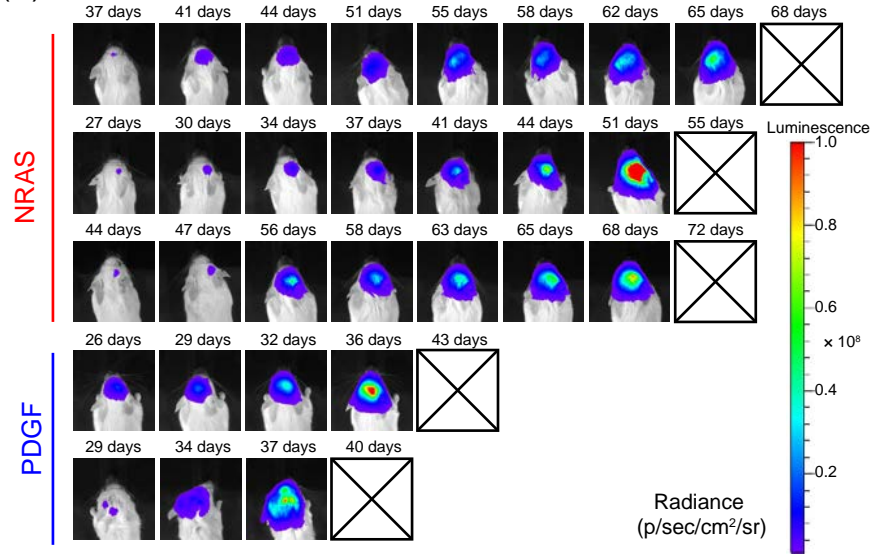

(C)

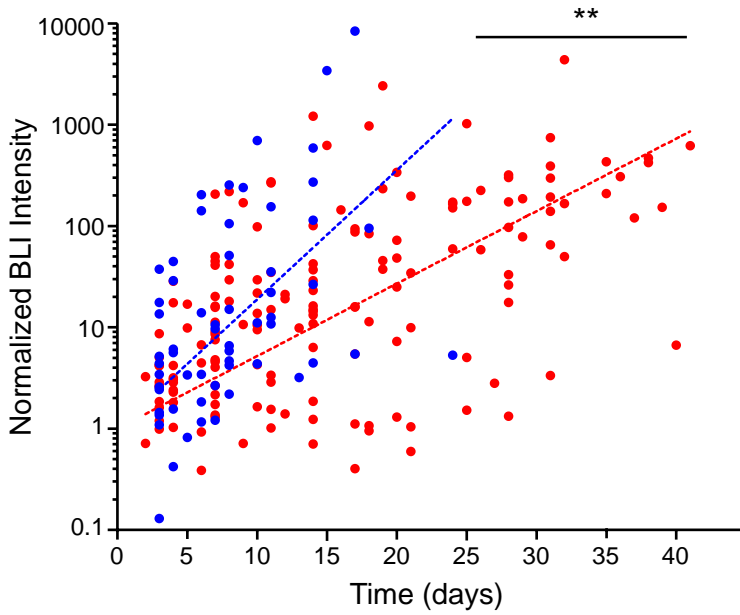

(D)

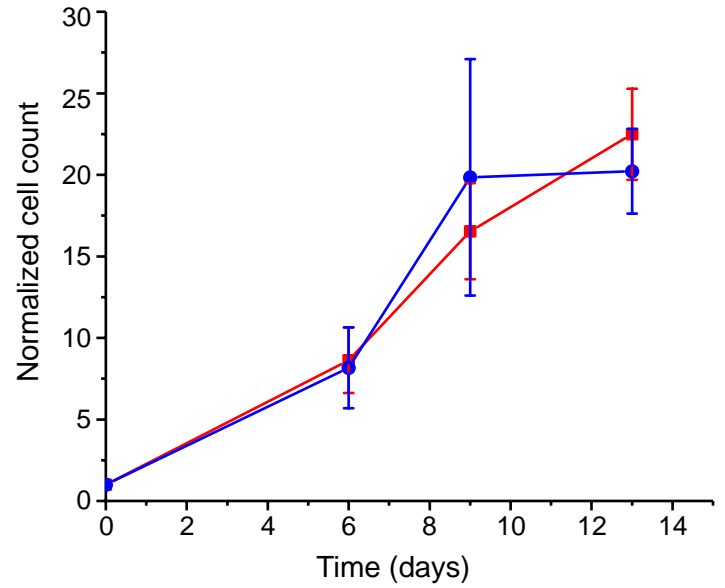



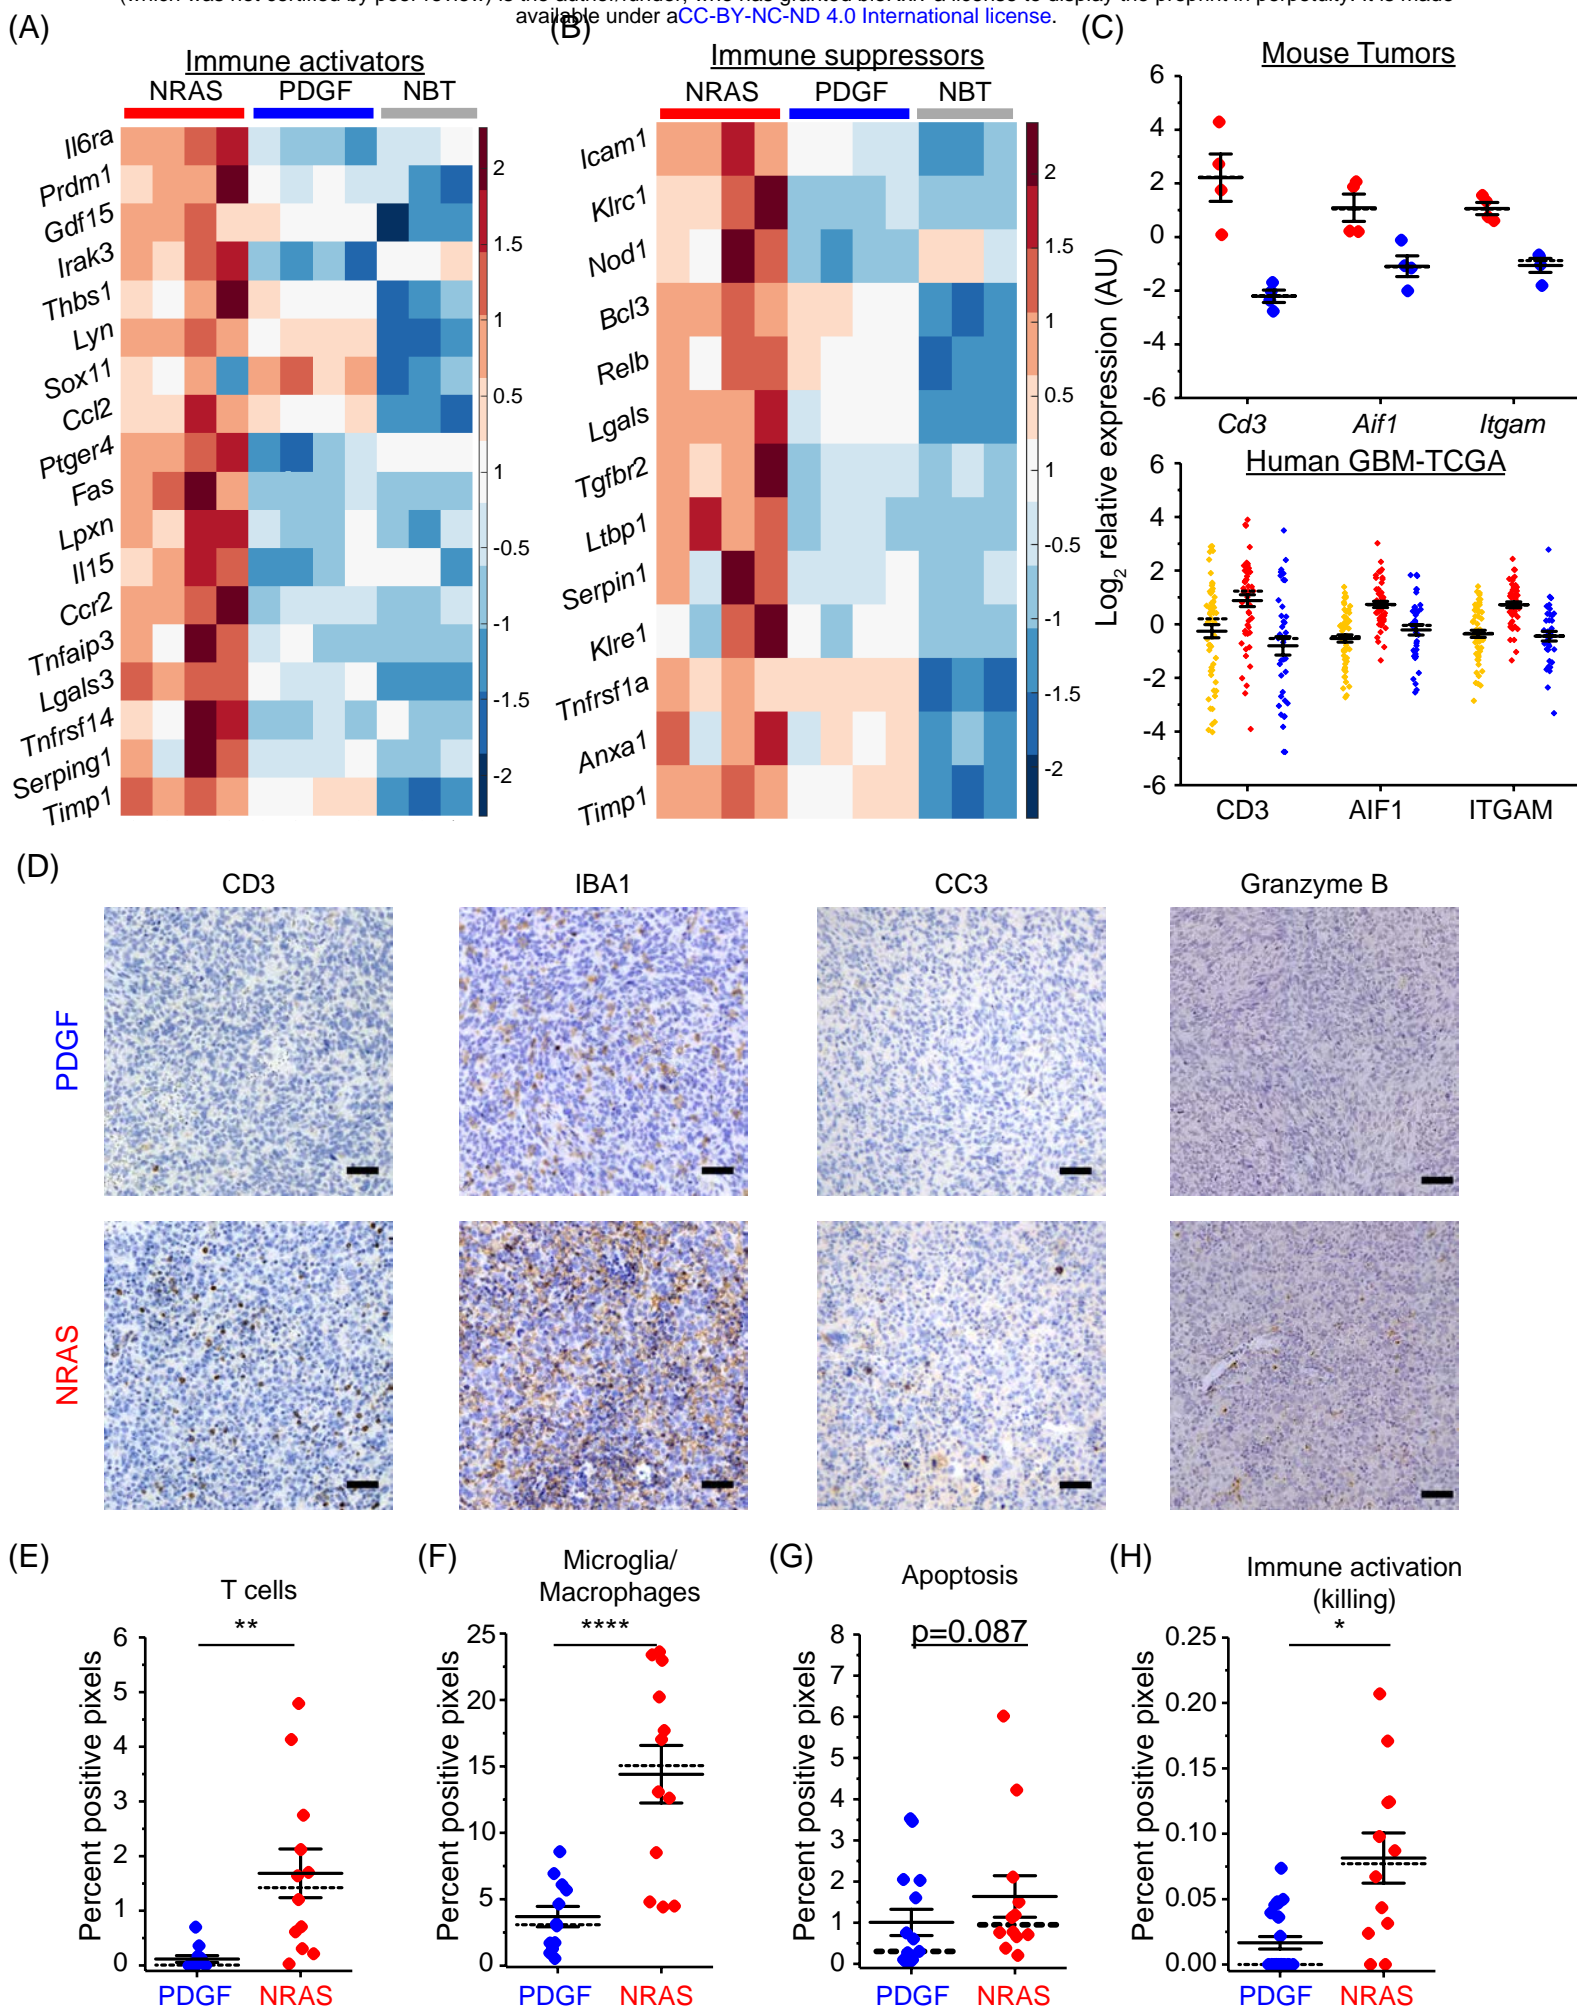

**Figure 8**

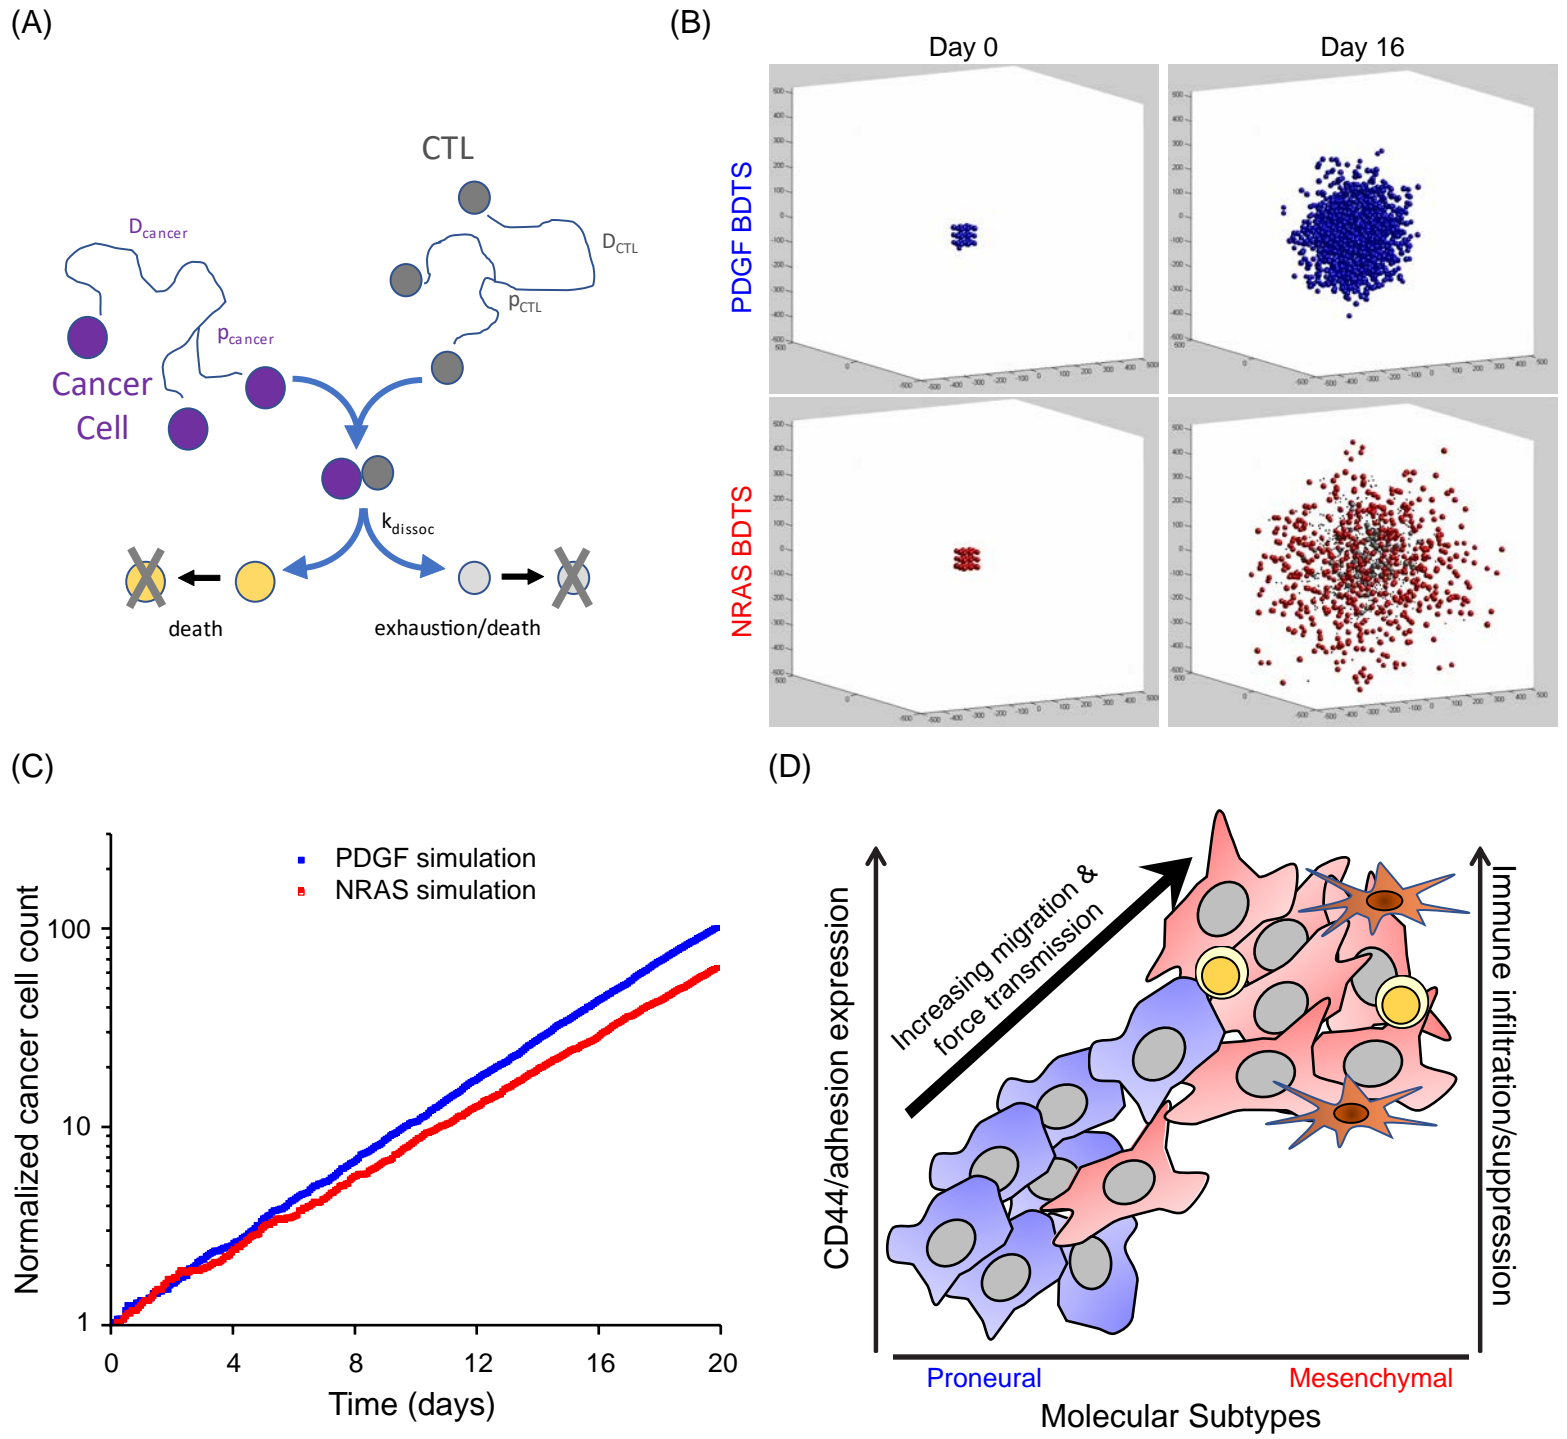

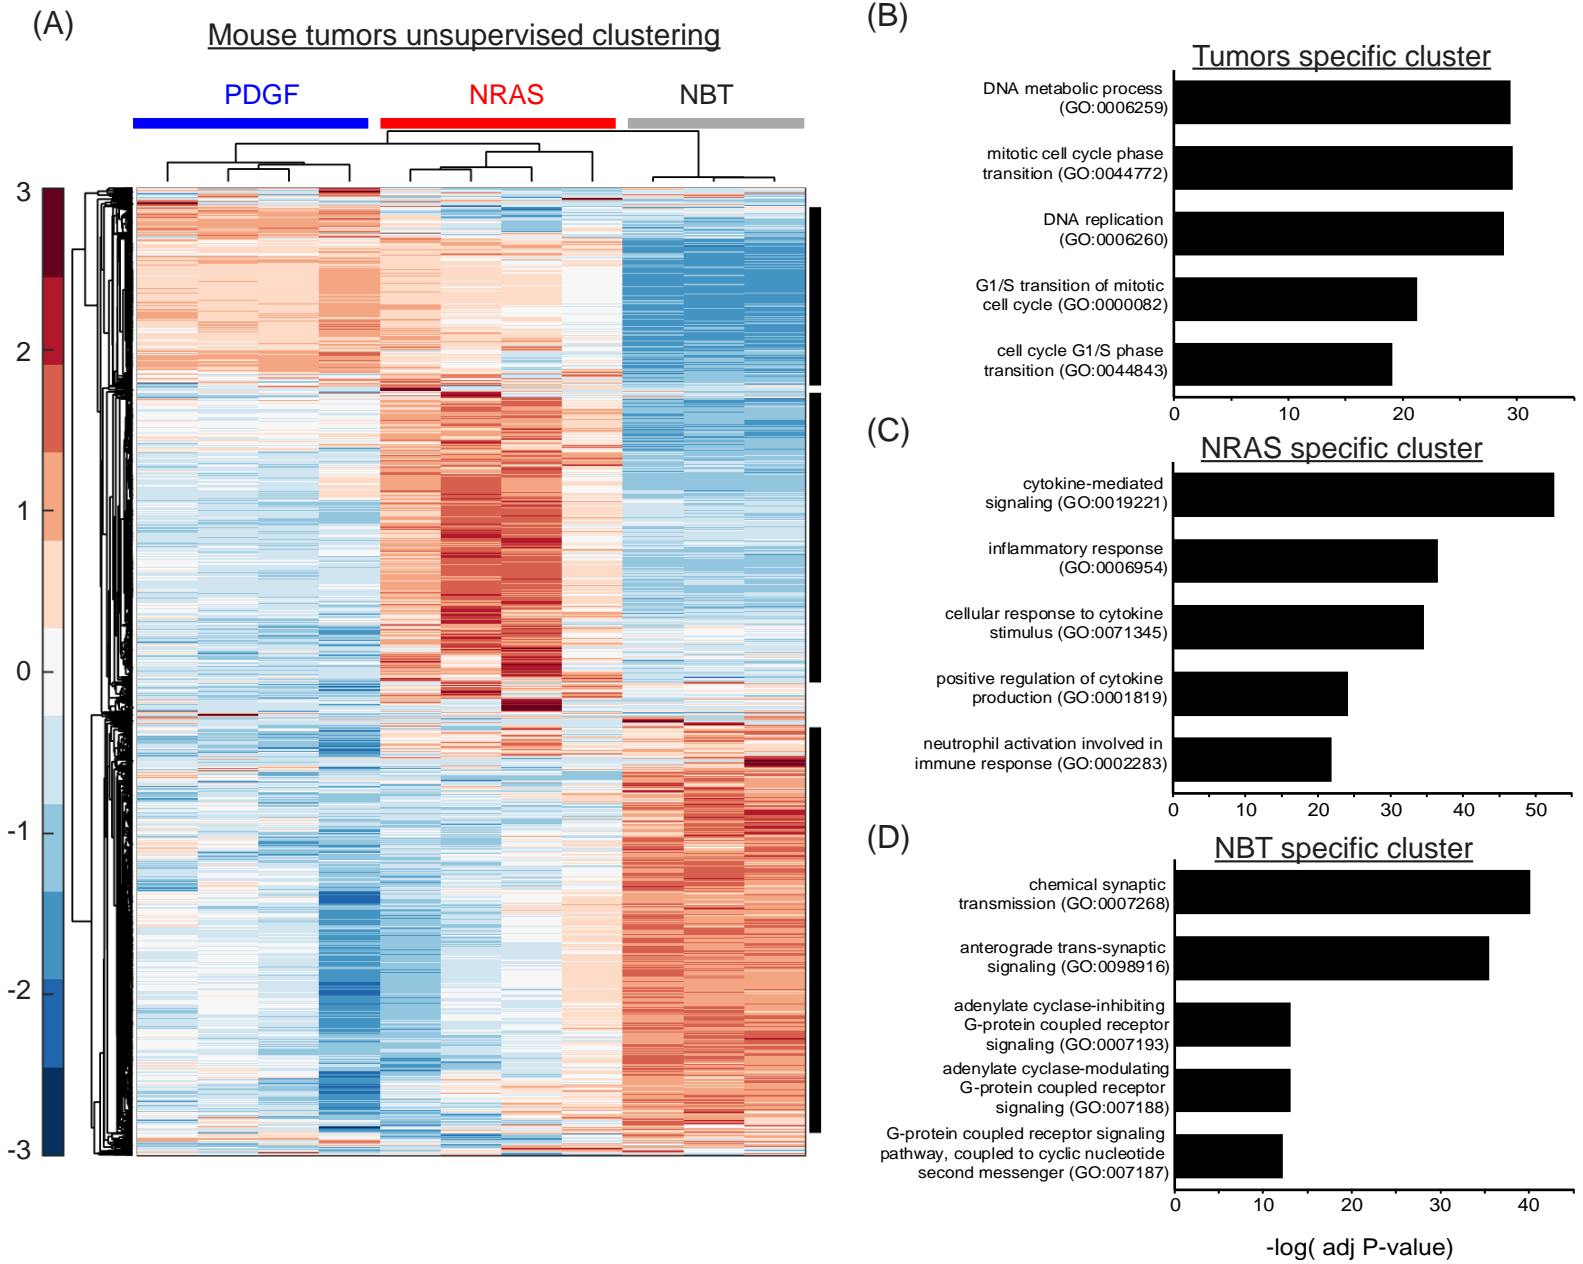

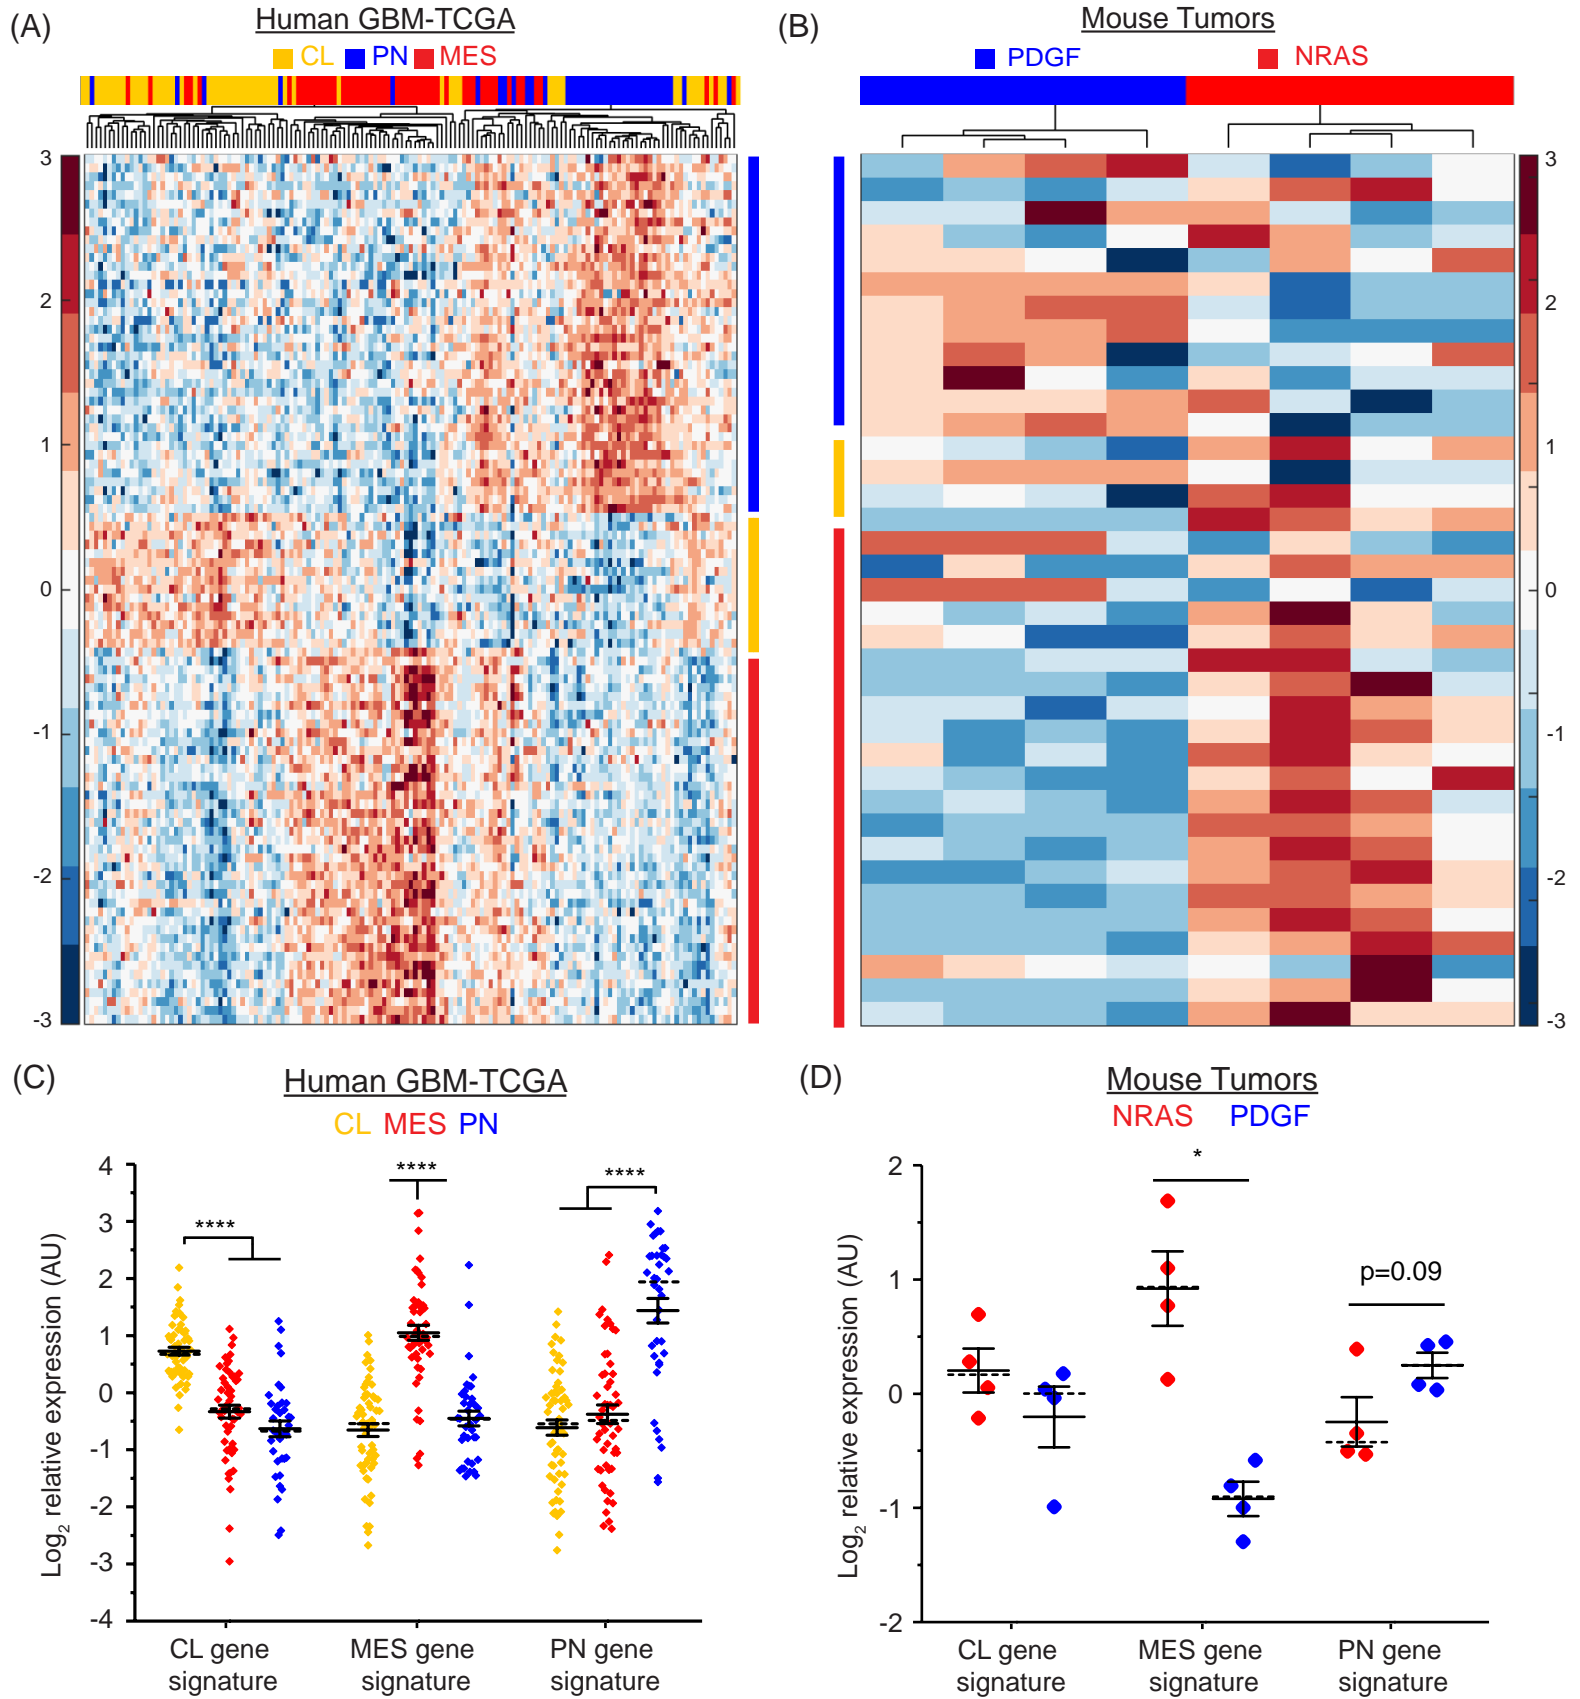

## Figure S3

(A)

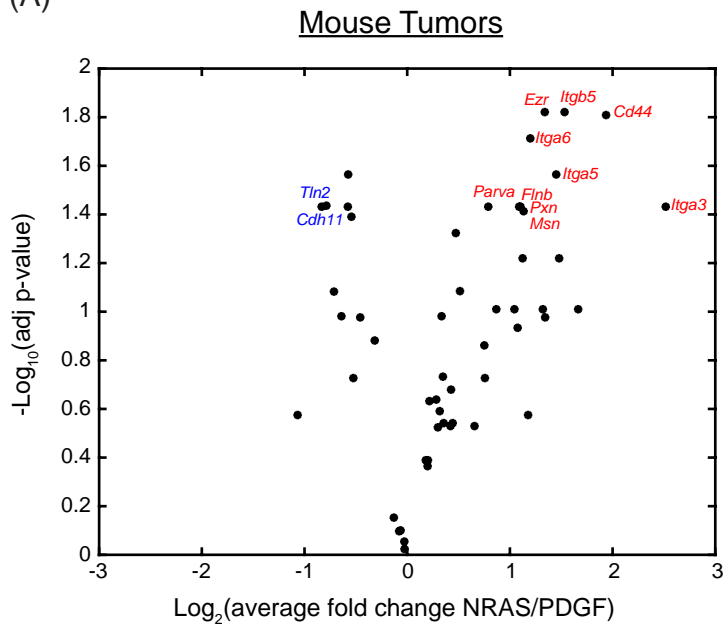

(B)

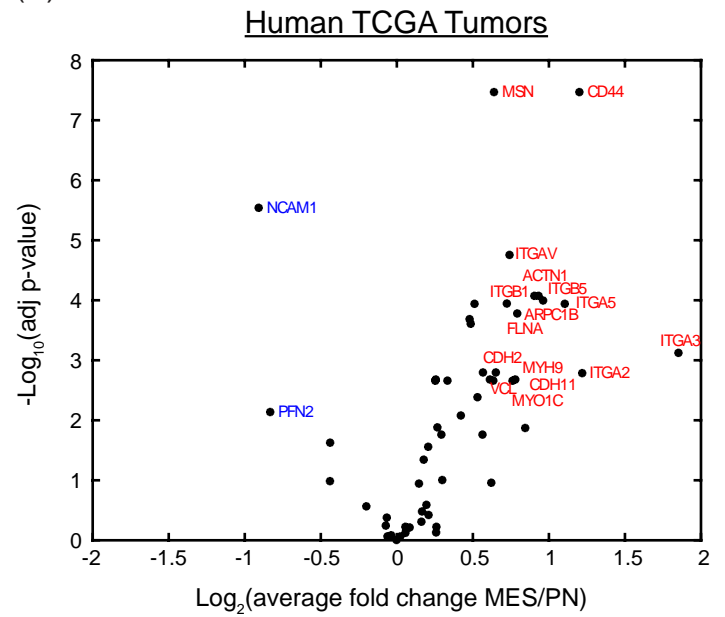

Figure S4

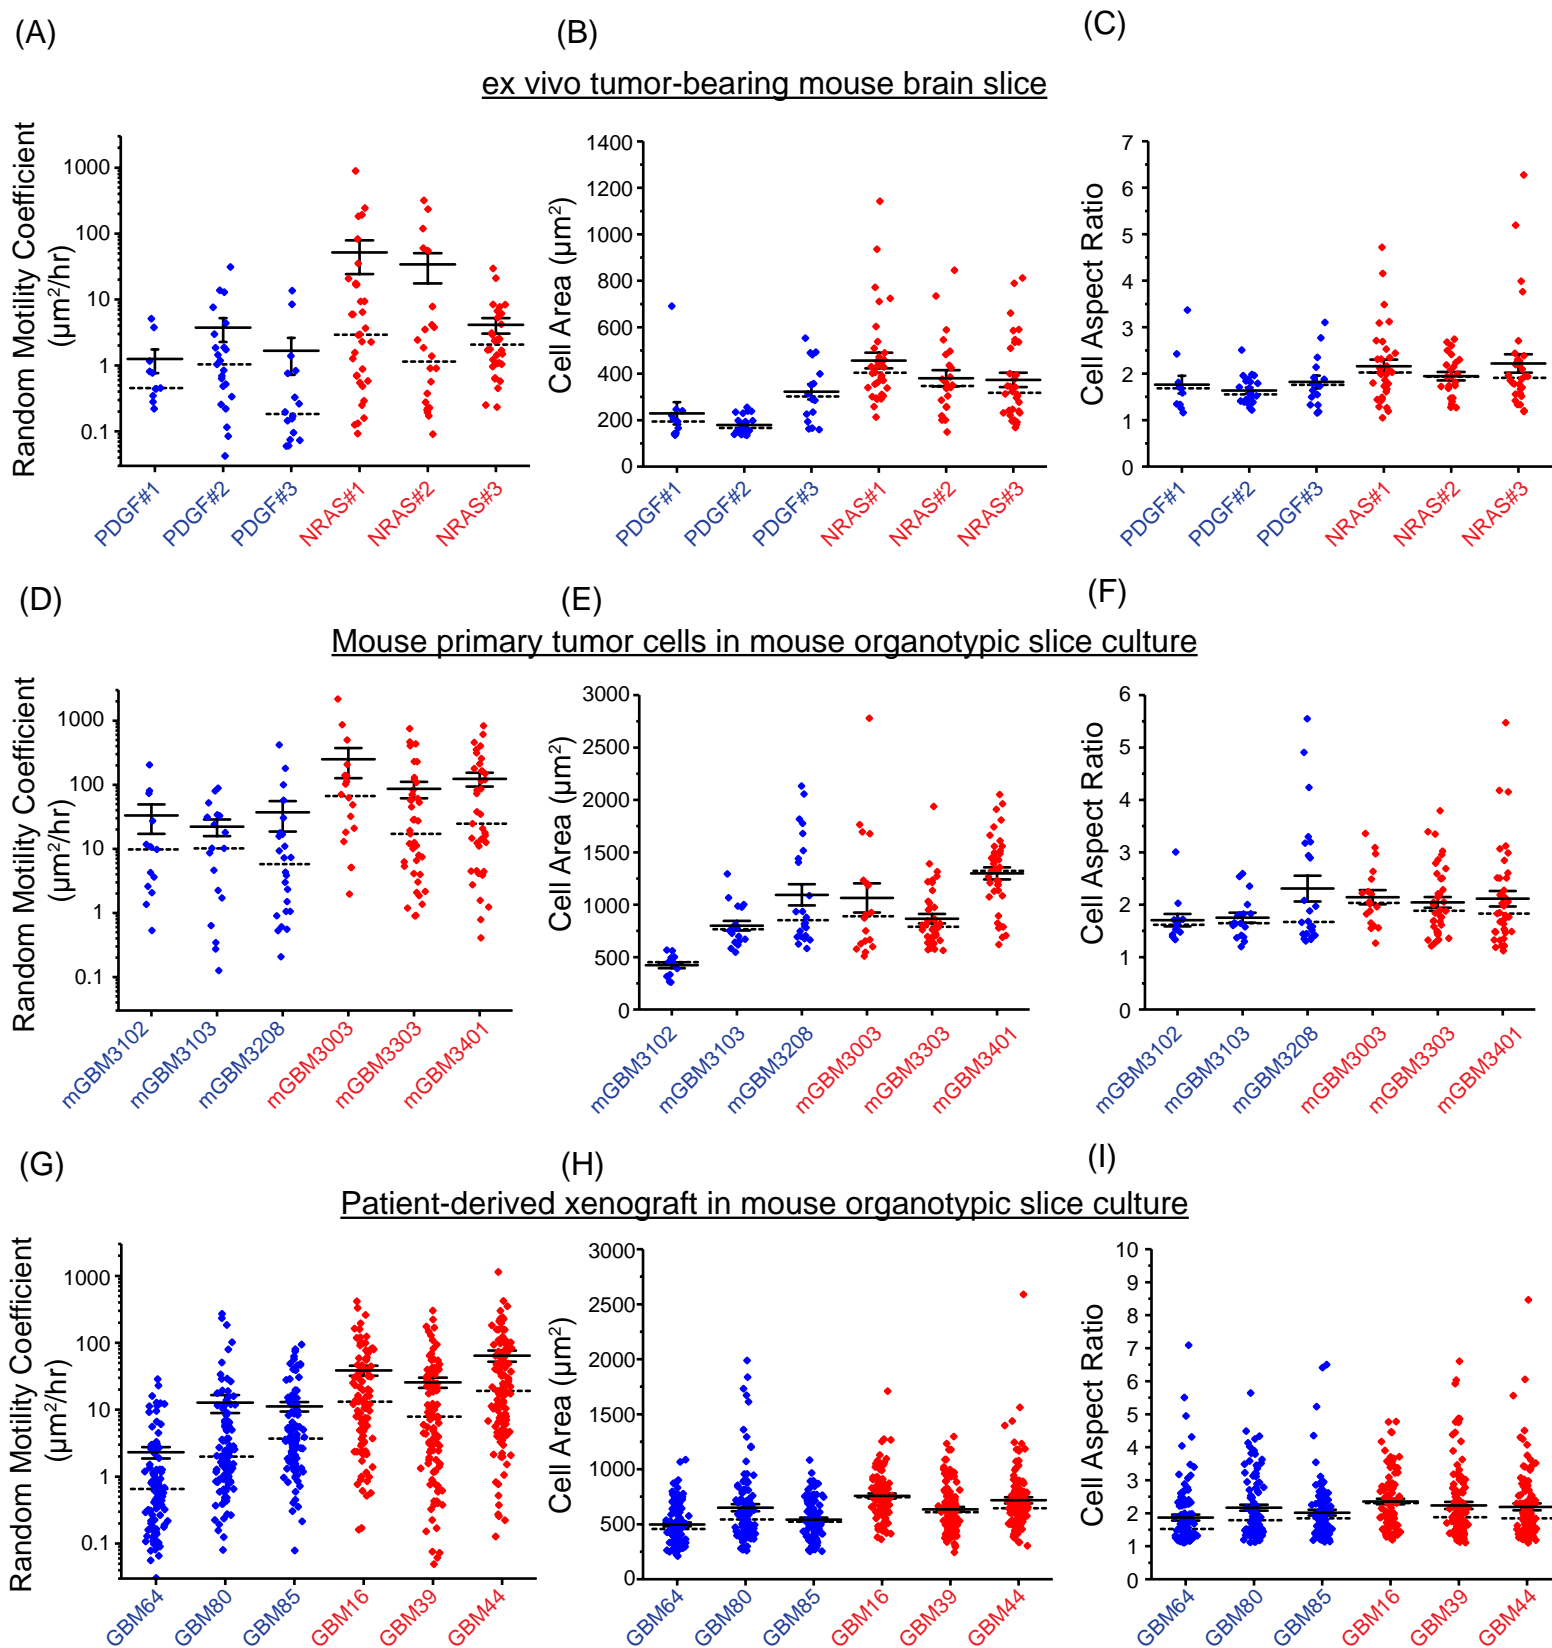

**Figure S5**

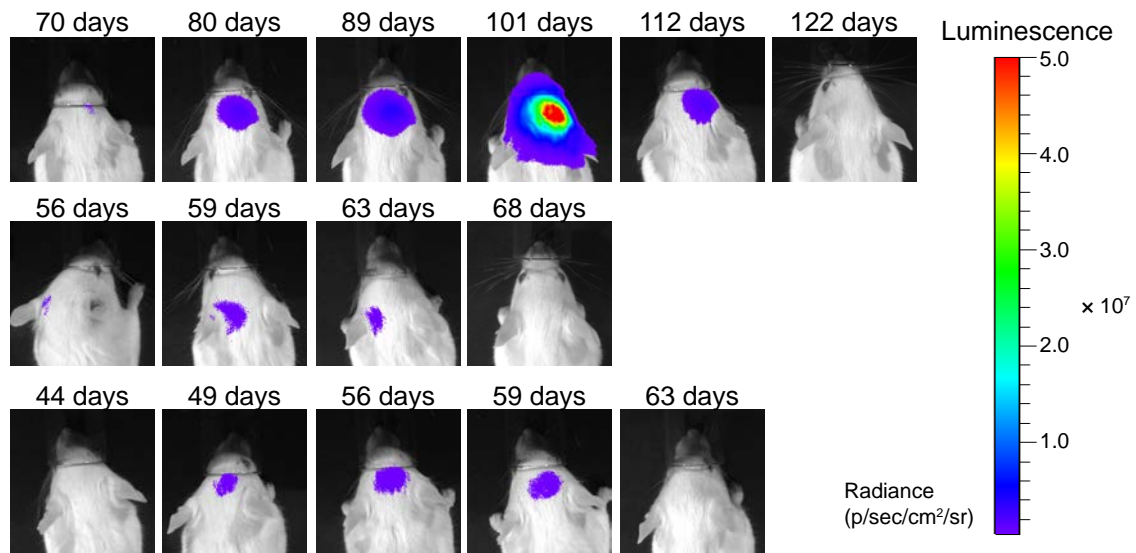

**Figure S6**

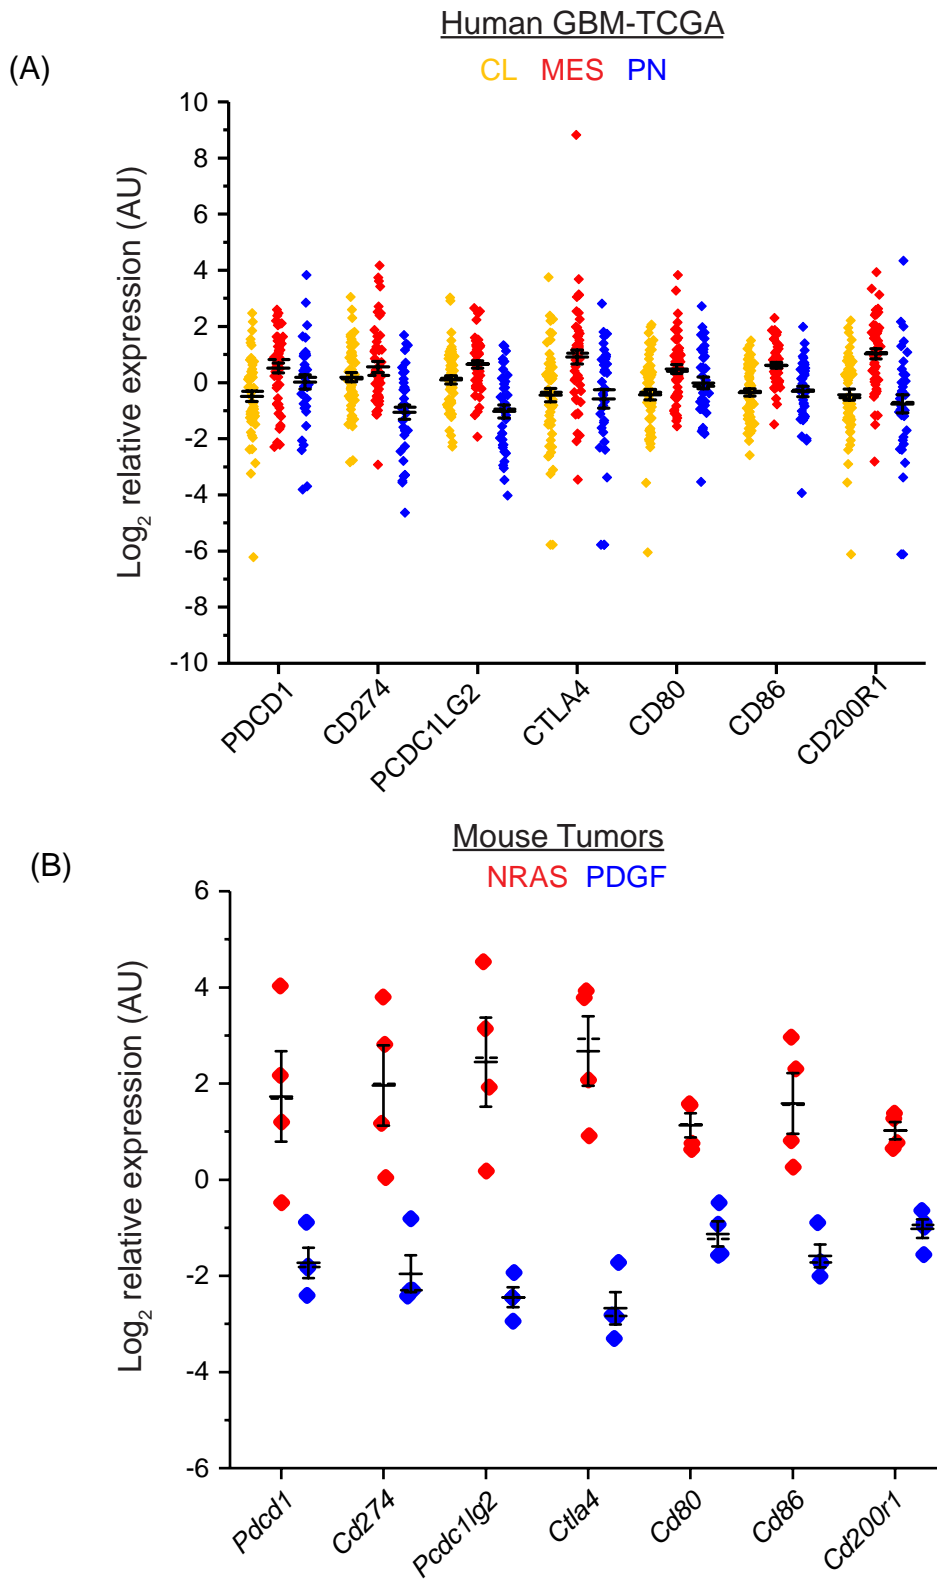

Source: https://www.biorxiv.org/content/10.1101/2022.06.26.497270v1.full.pdf
